# Supplementary material for: Diet–Microbiota Interactions Alter Mosquito Development
Source: Frontiers journal article supplement (doi:10.3389/fmicb.2021.650743), 2021-06-08

## Notes about this document:

- Top view = viewed from top of agar plate
- Bottom view = view from bottom of agar plate
- 0.8x or 2.0x = magnification

*E. coli*, K-12 subsets. MG1655

Top View

Day 1

Day 2

0.8x

2.0x

0.8x

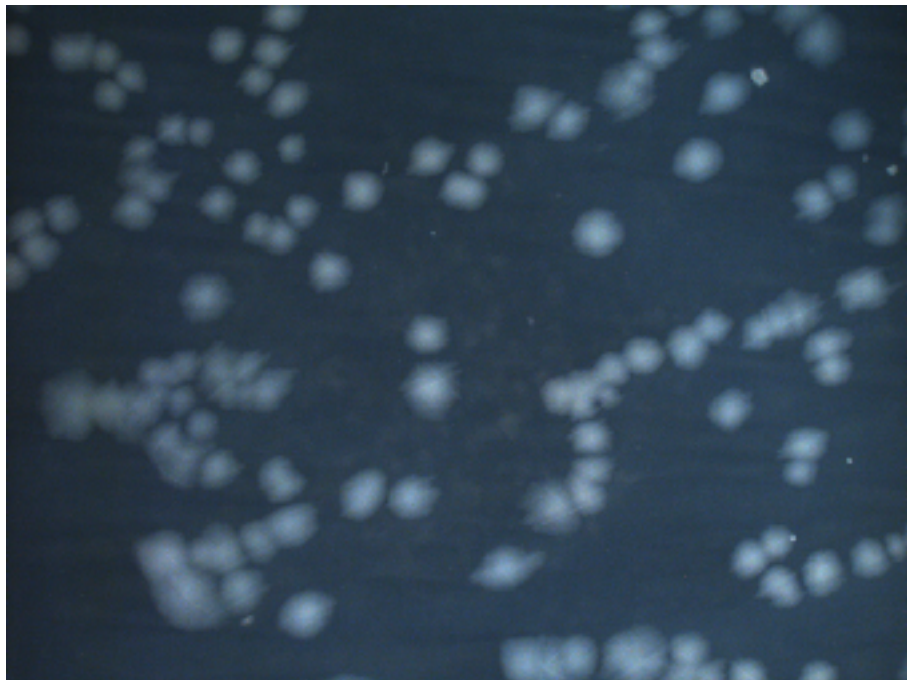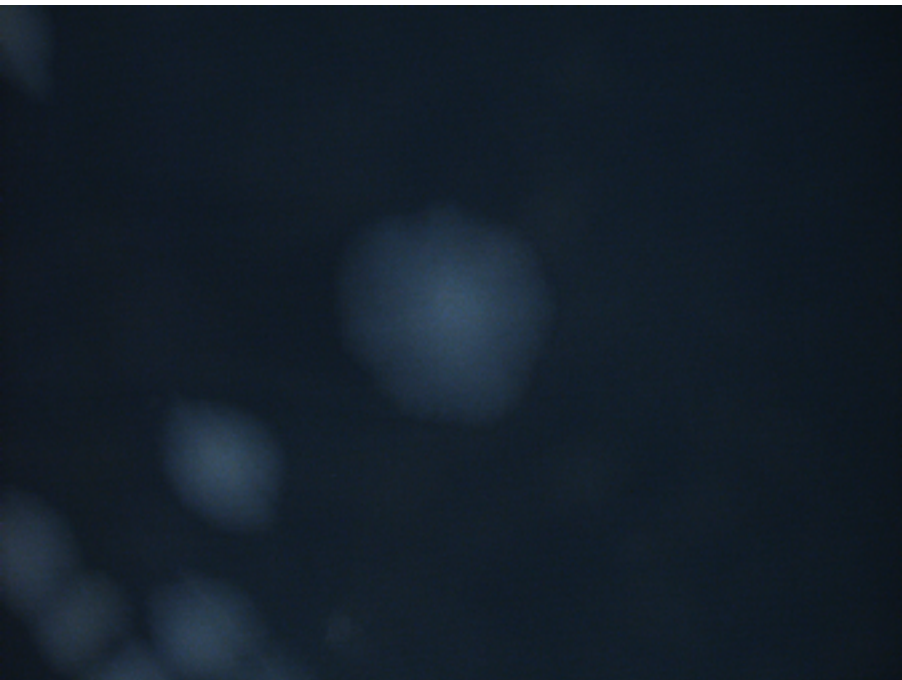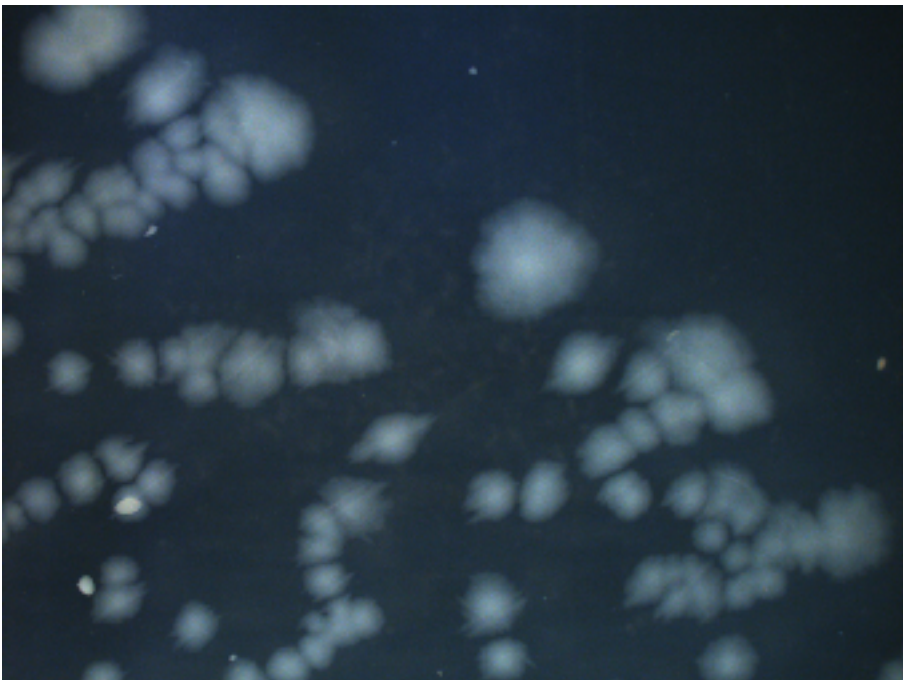

Bottom View

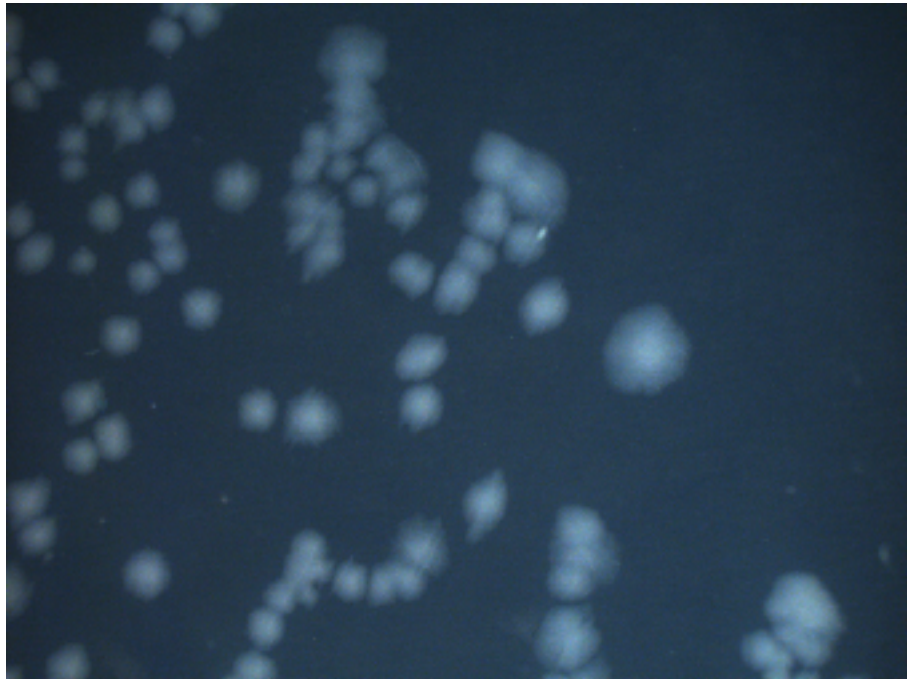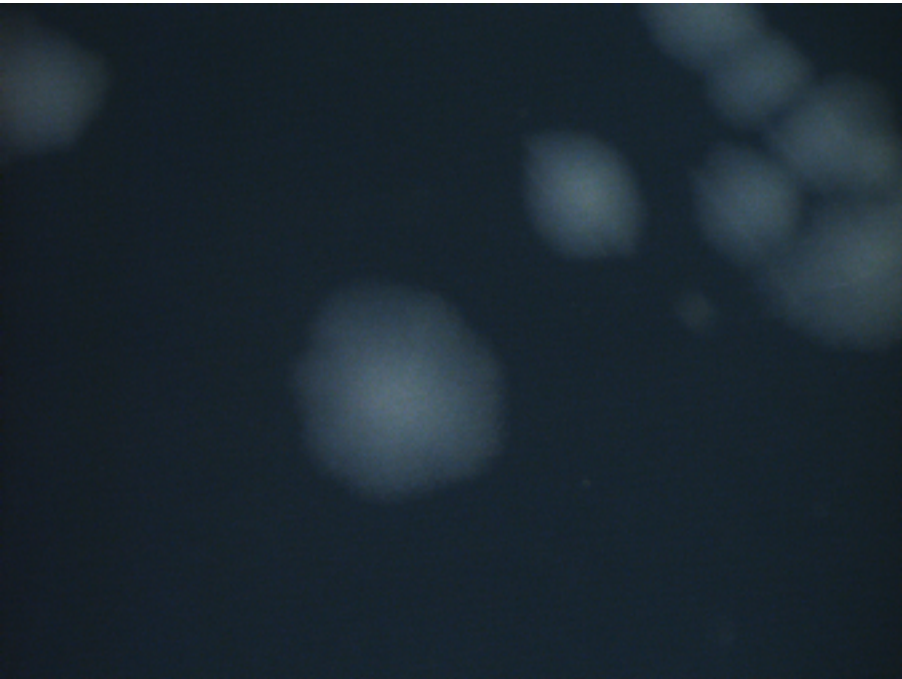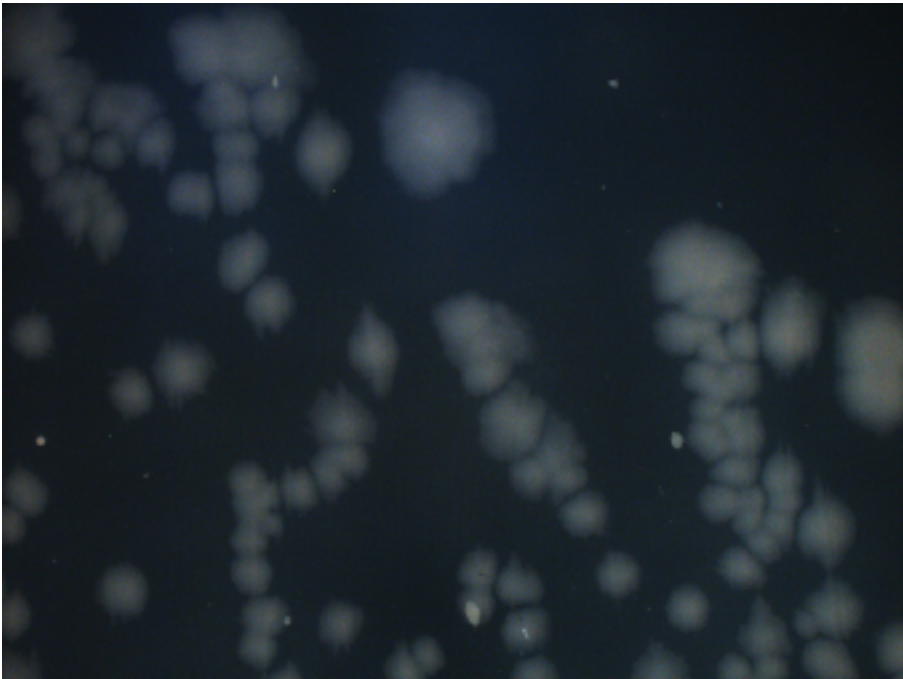



***Microbacterium*, Lab0001**

**Top View**

**Day 1**

**Day 2**

**Older**

**0.8x**

**Pinpoint**

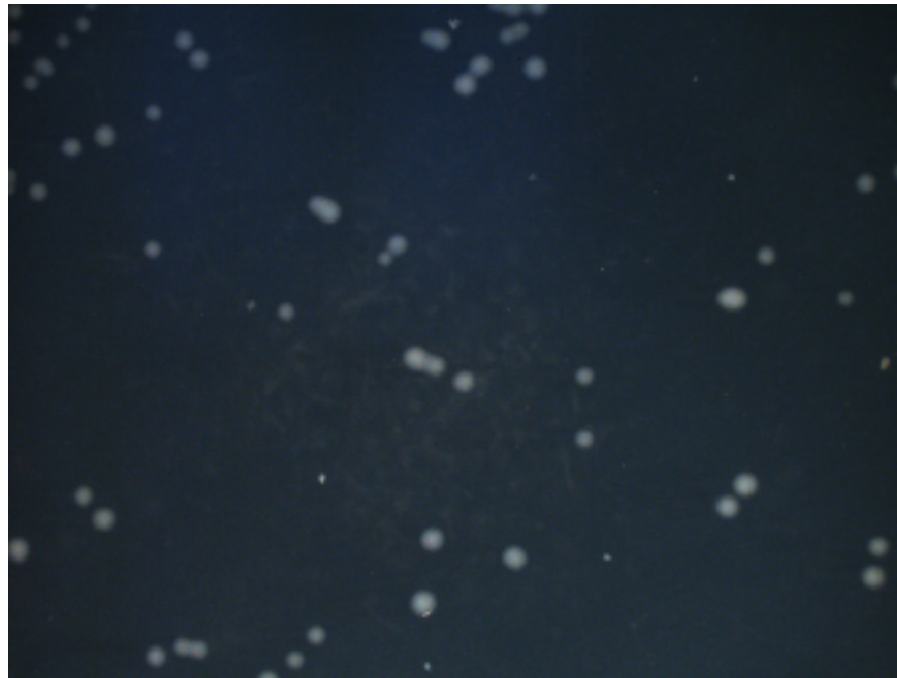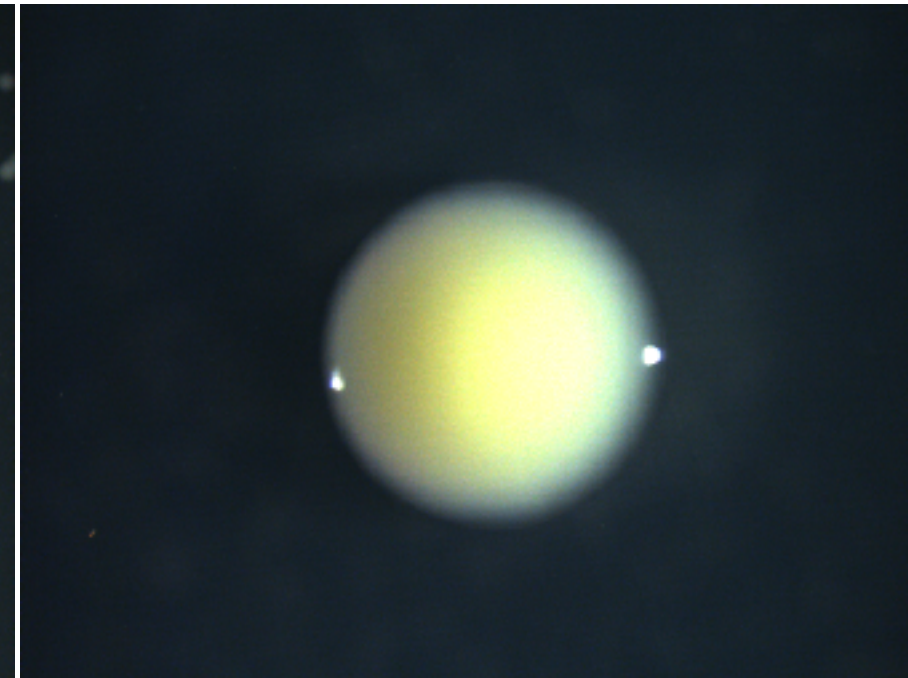

**Bottom View**

**Pinpoint**

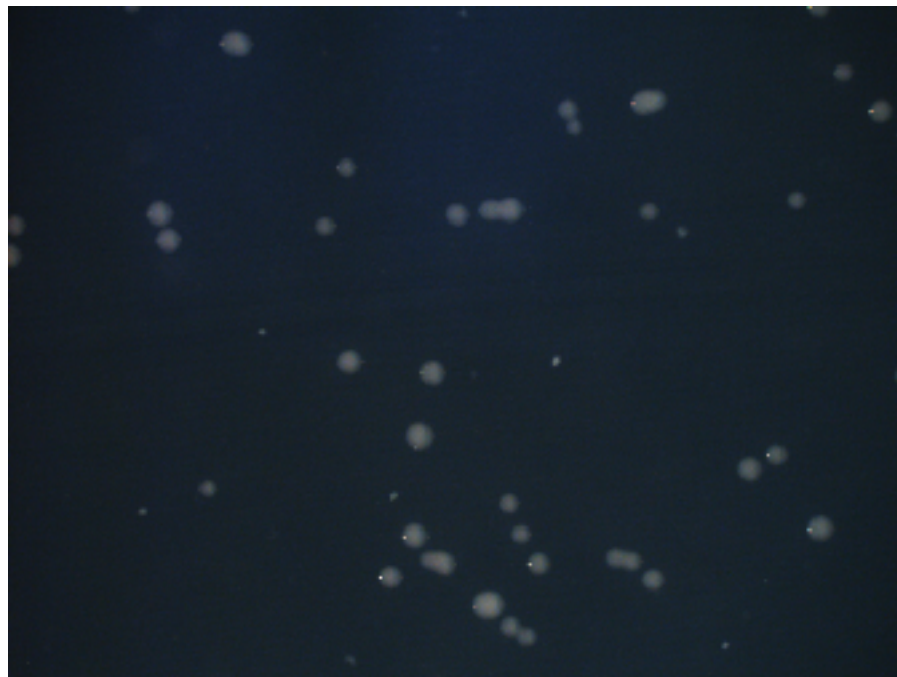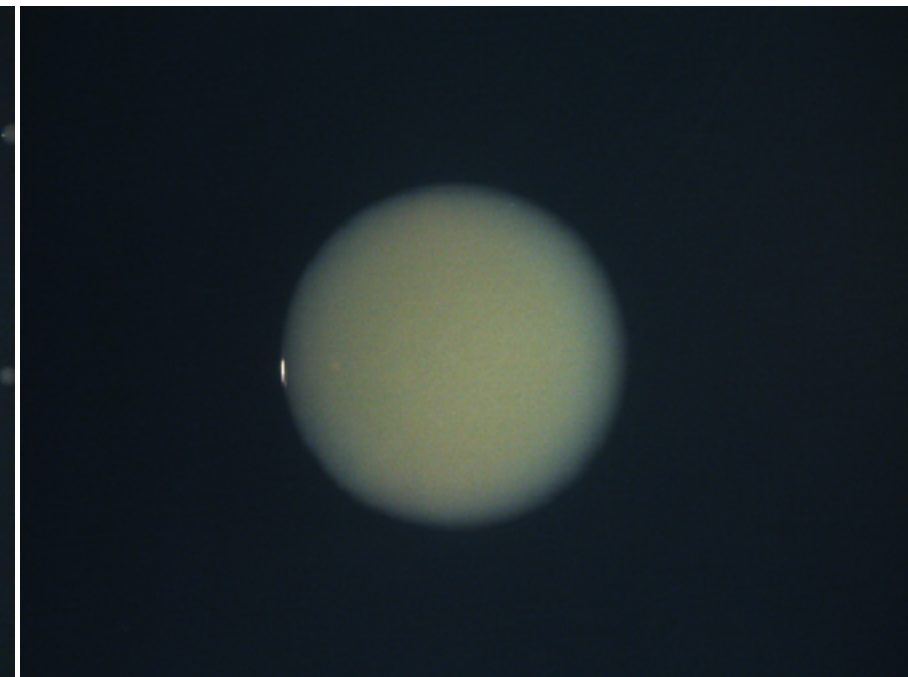



***Rahnella*, Rain0009**

**Top View**

**Day 1**

**Day 2**

**0.8x**

**2.0x**

**0.8x**

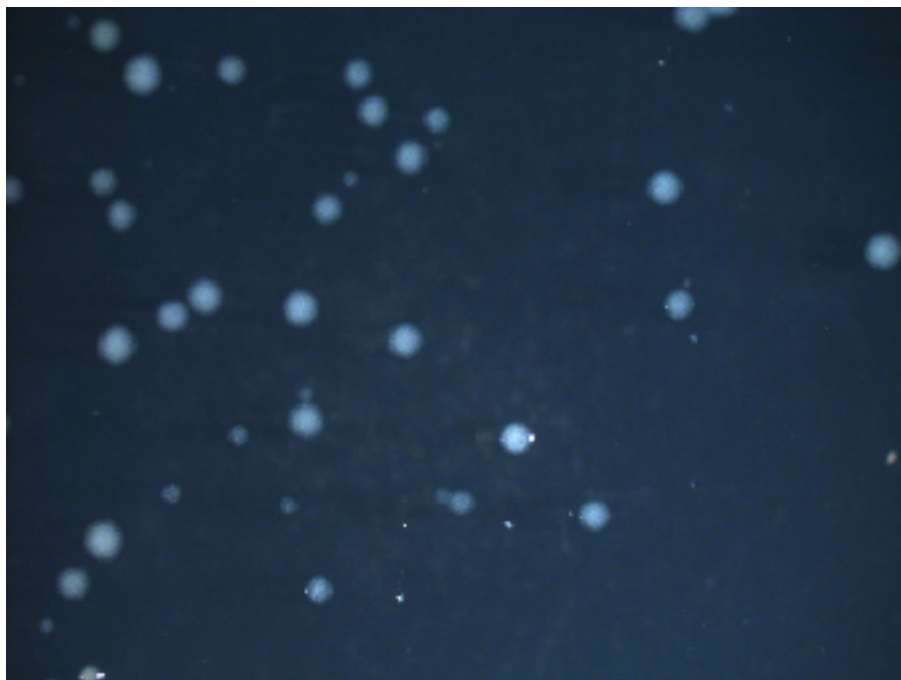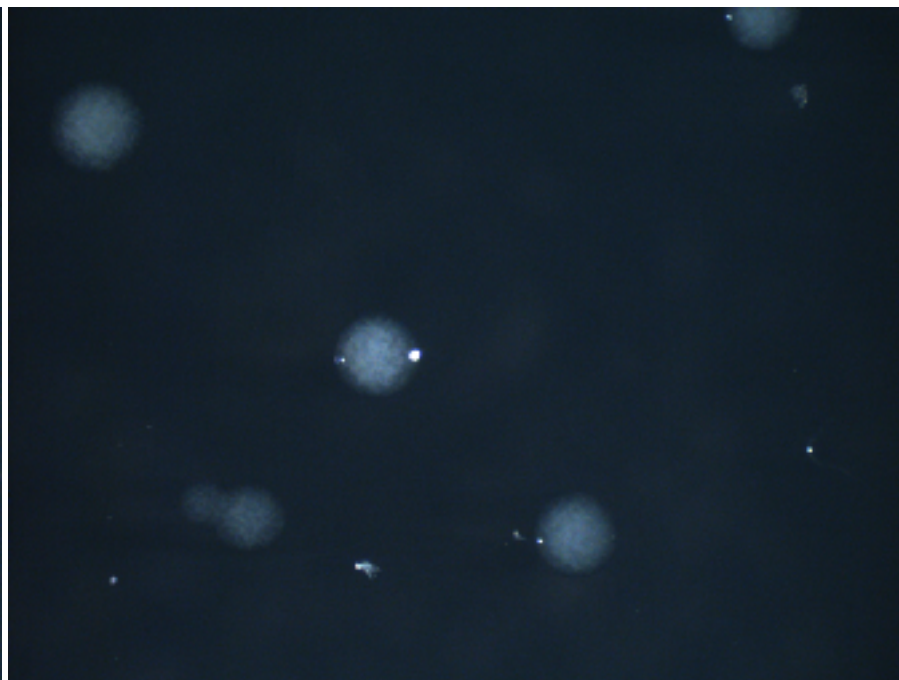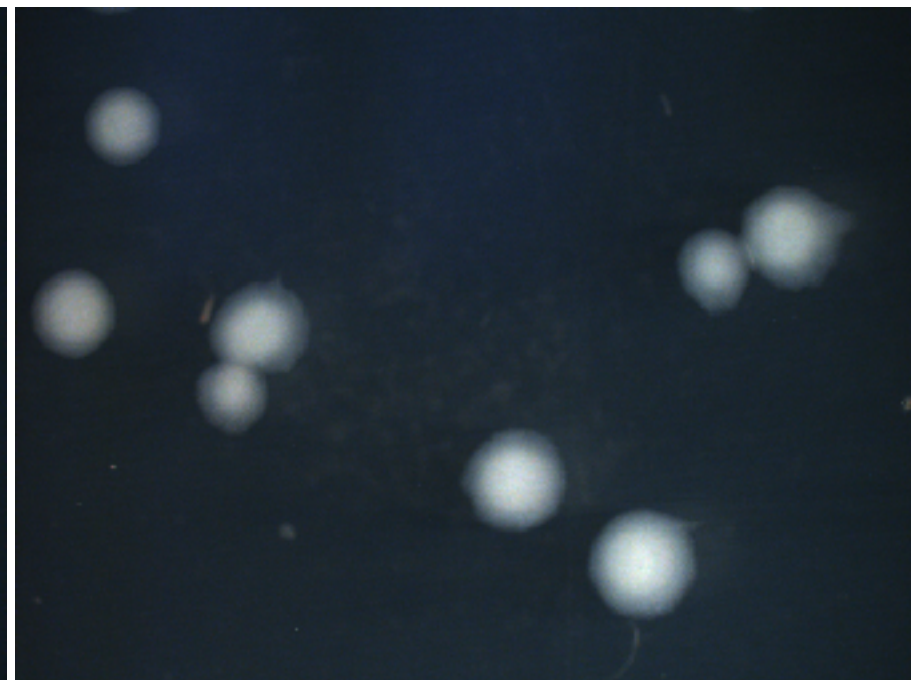

**Bottom View**

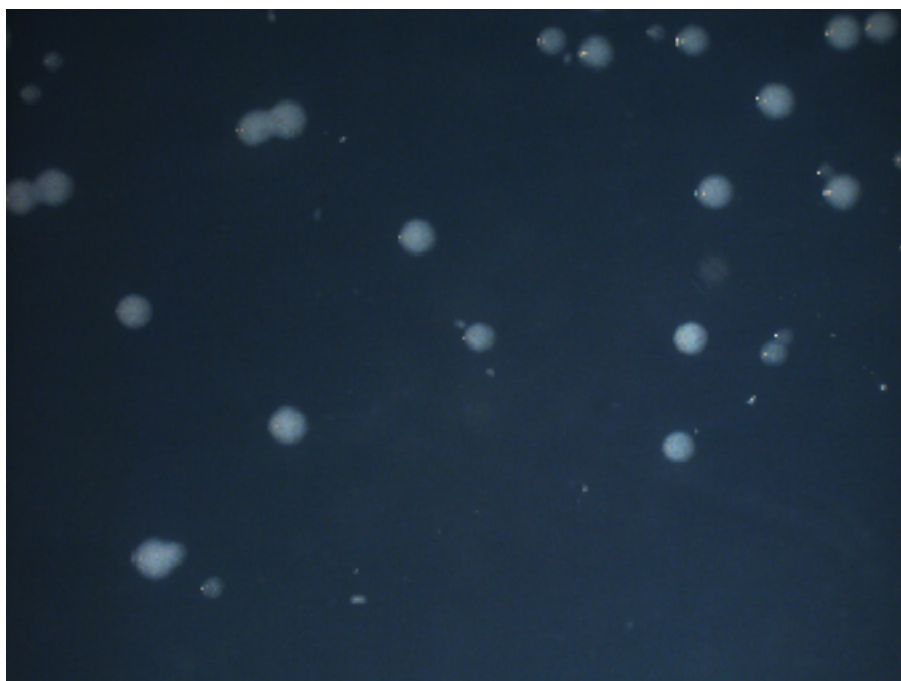

**No photo**

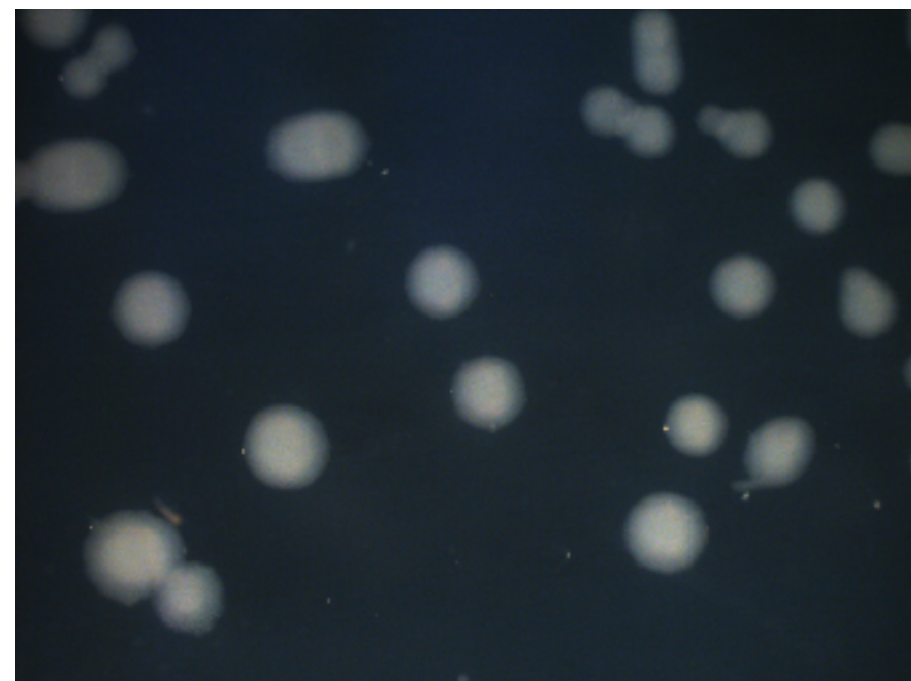



*Serratia*, Rain0010

Top View

Day 1

Day 2

0.8x

0.8x

2.0x

Pinpoint

Bottom View

Pinpoint



*Flectobacillus*, Rain0001

Top View

Day 1

Day 2

0.8x

2.0x

0.8x

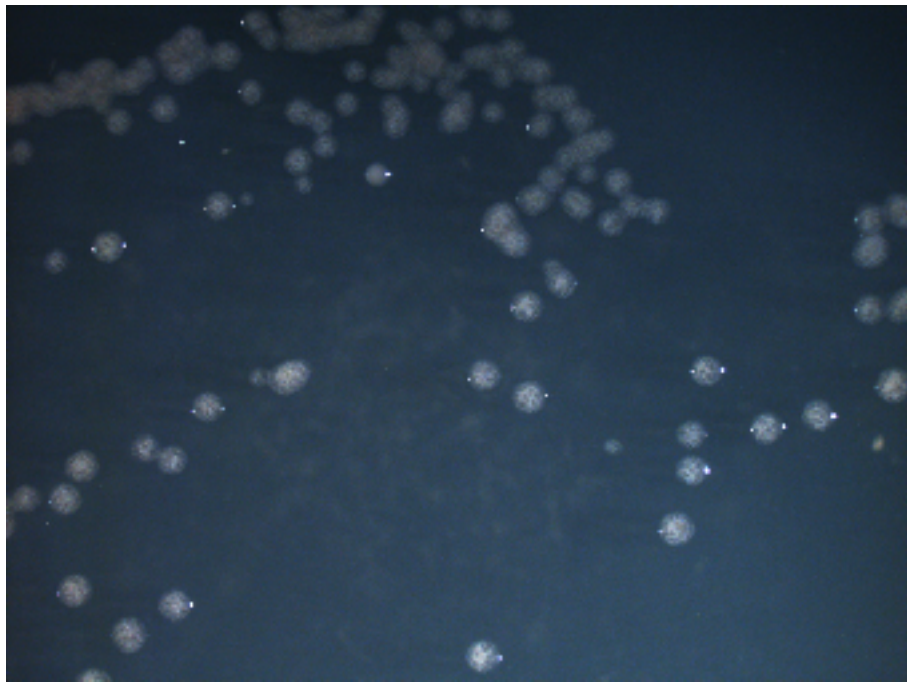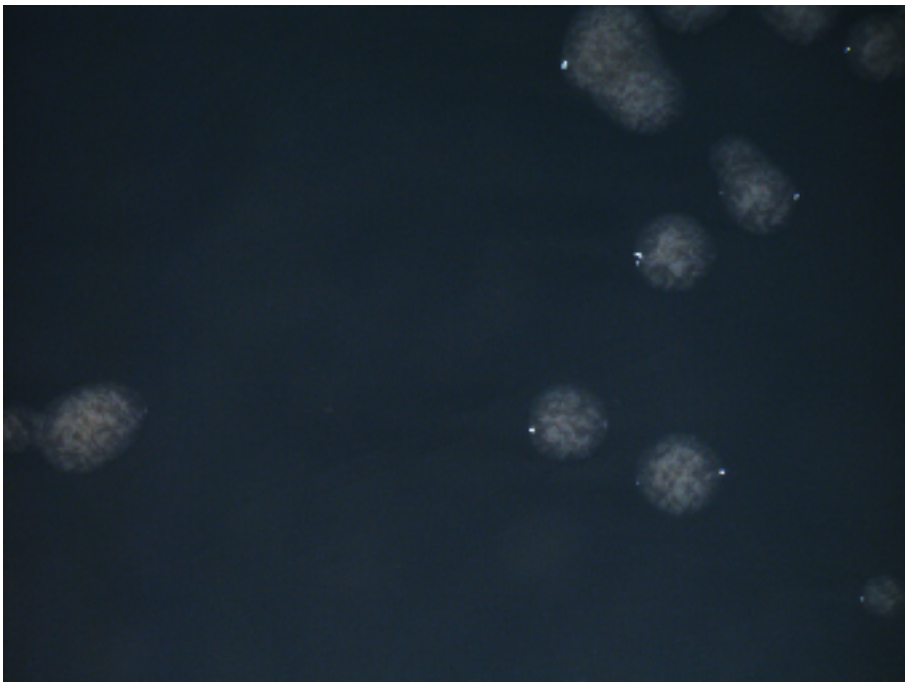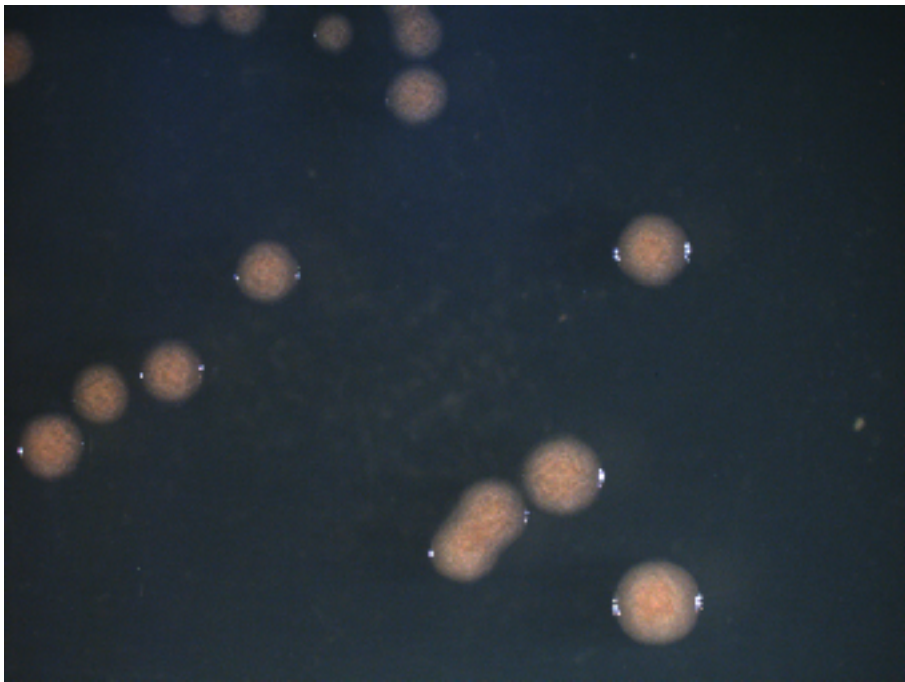

Bottom View

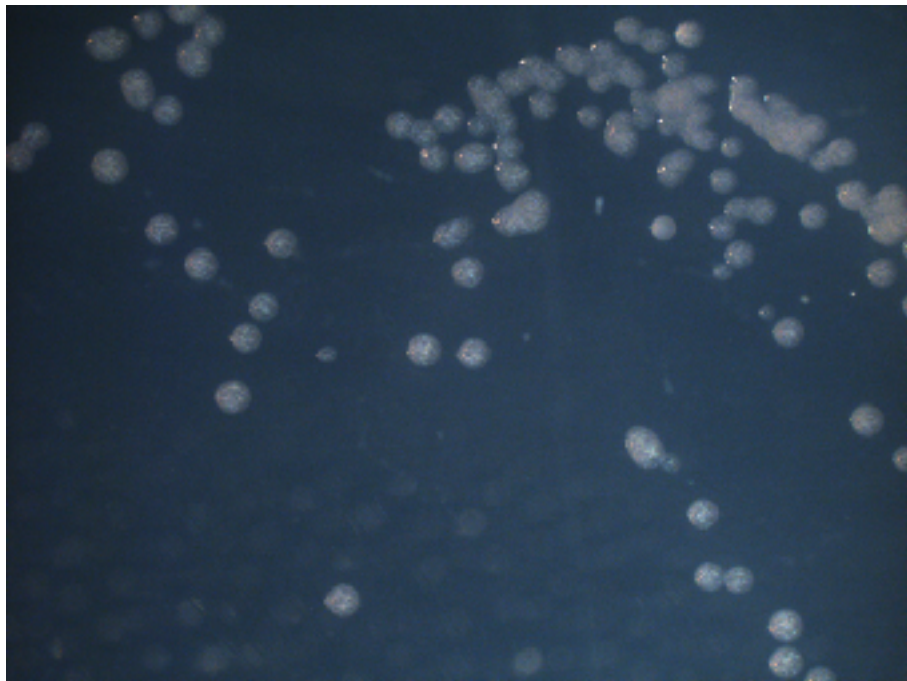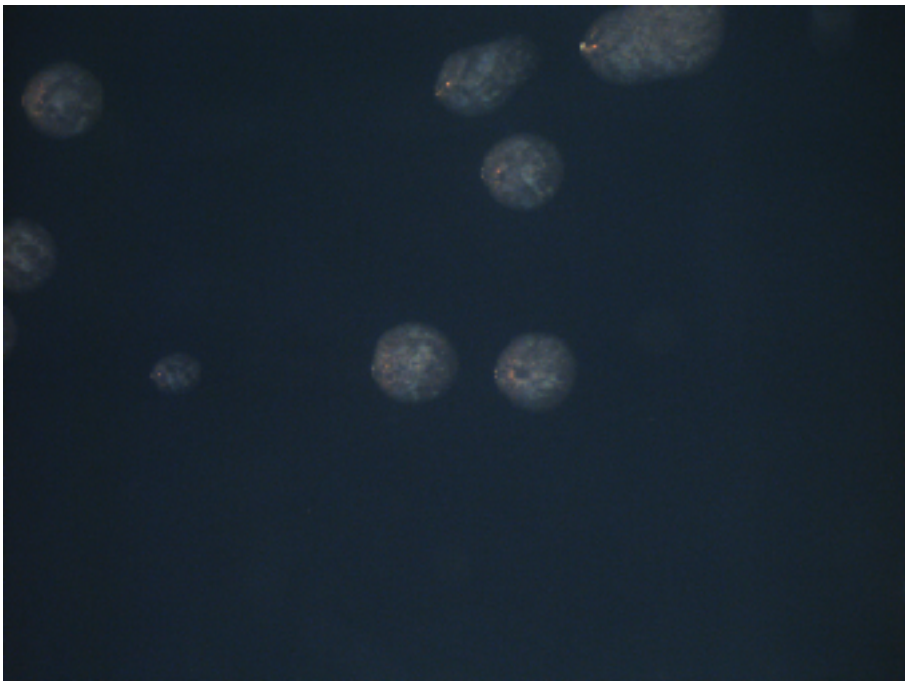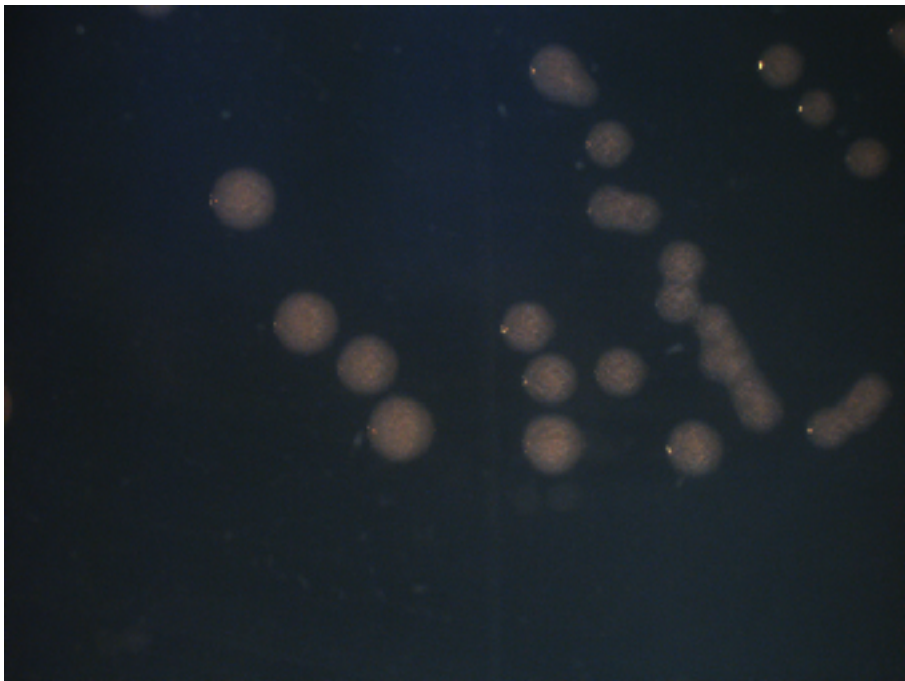



*Sphingobacterium*, Lab0004

Top View

Day 1

Day 2

0.8x

2.0x

0.8x

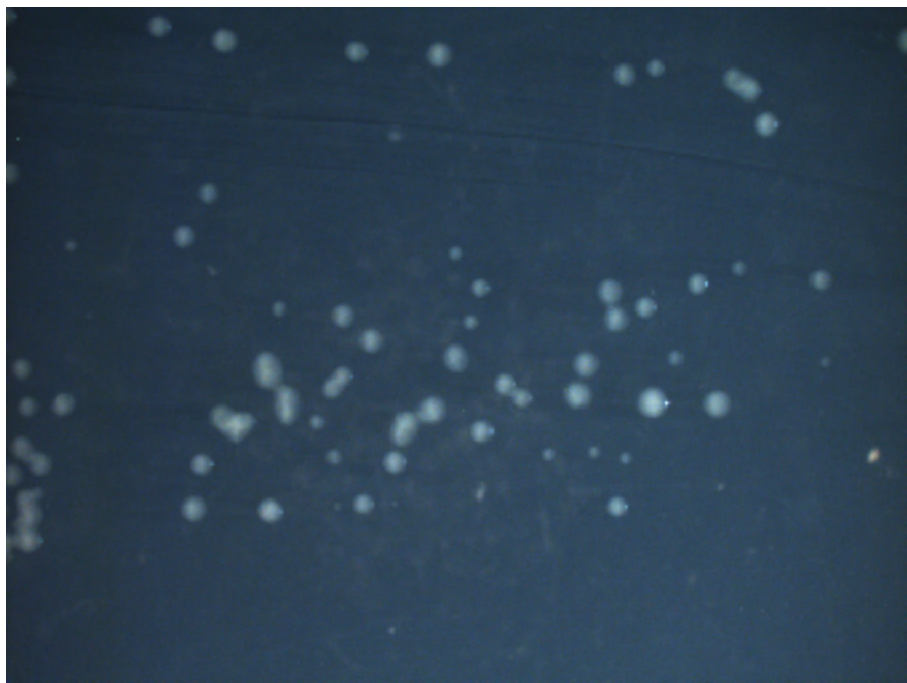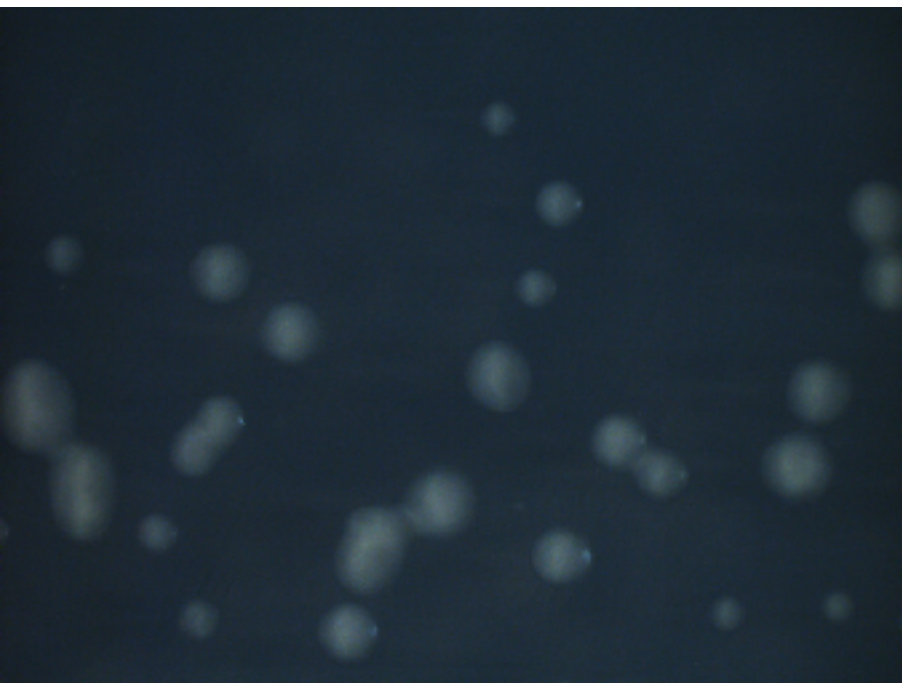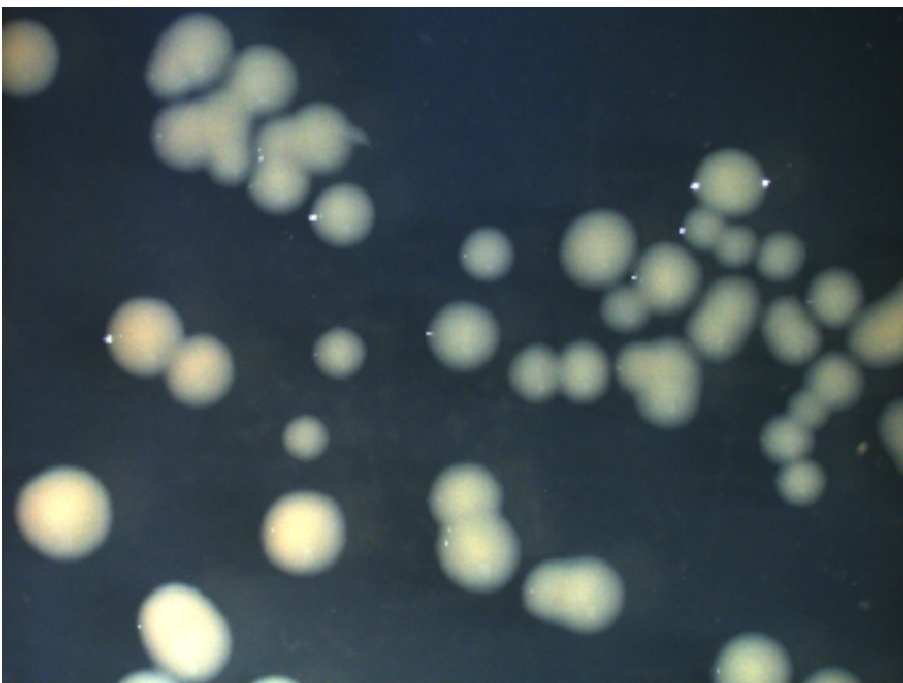

Bottom View

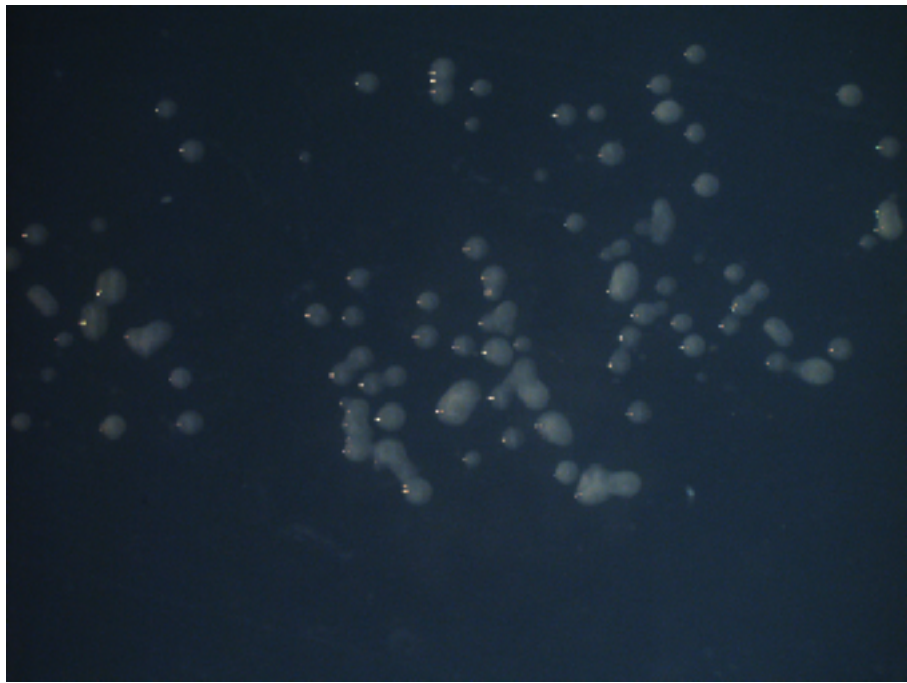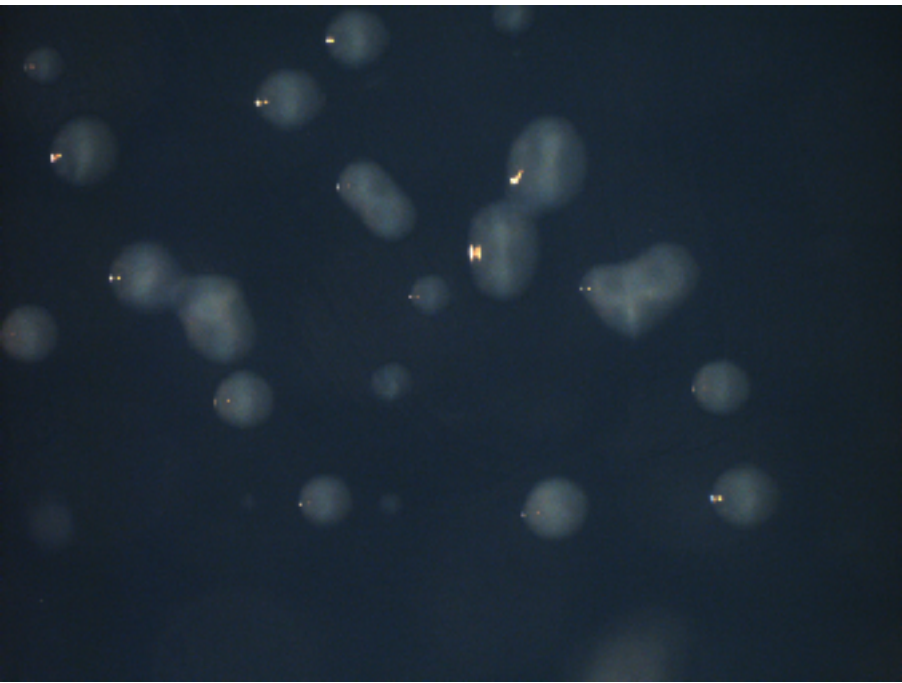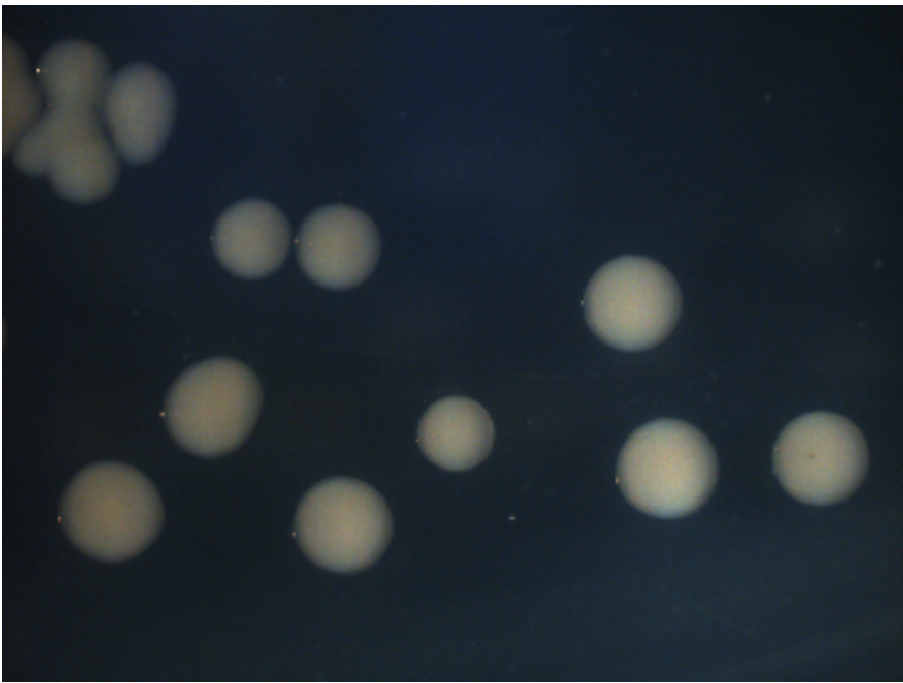



# *Acinetobacter*, River0008

## Top View

Day 1

Day 2

0.8x

2.0x

0.8x

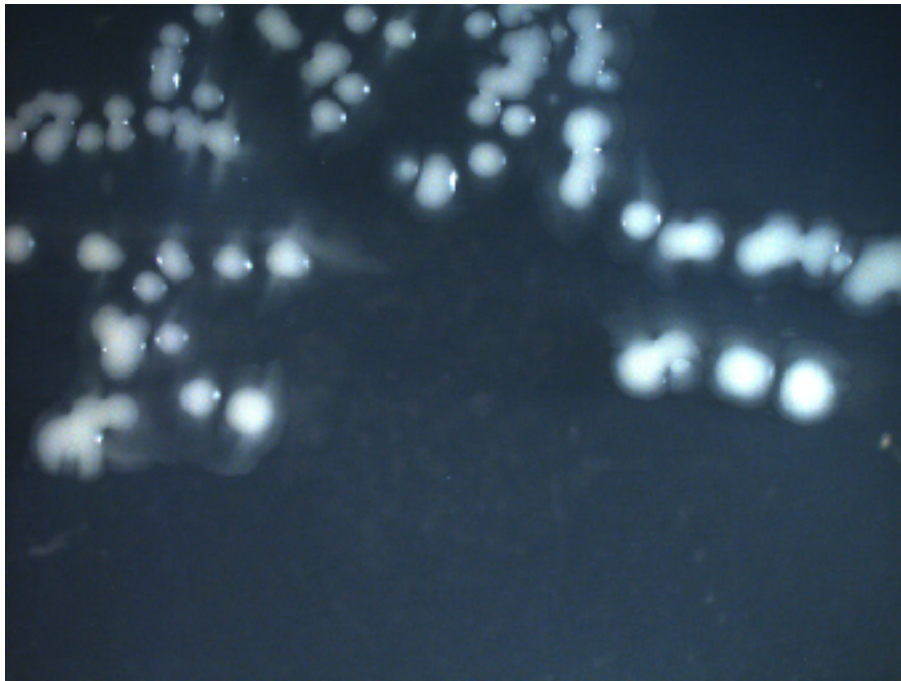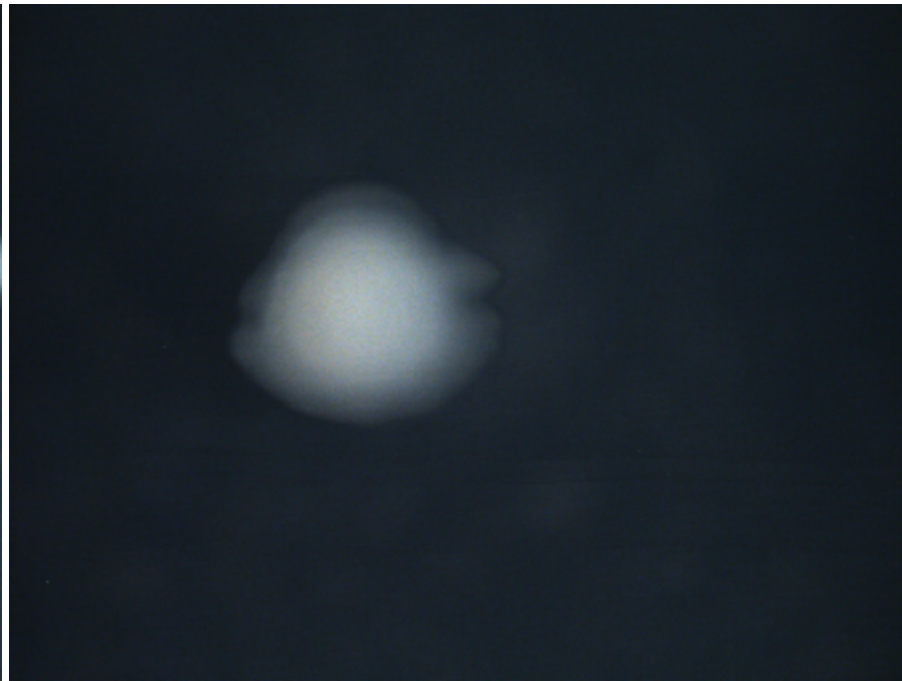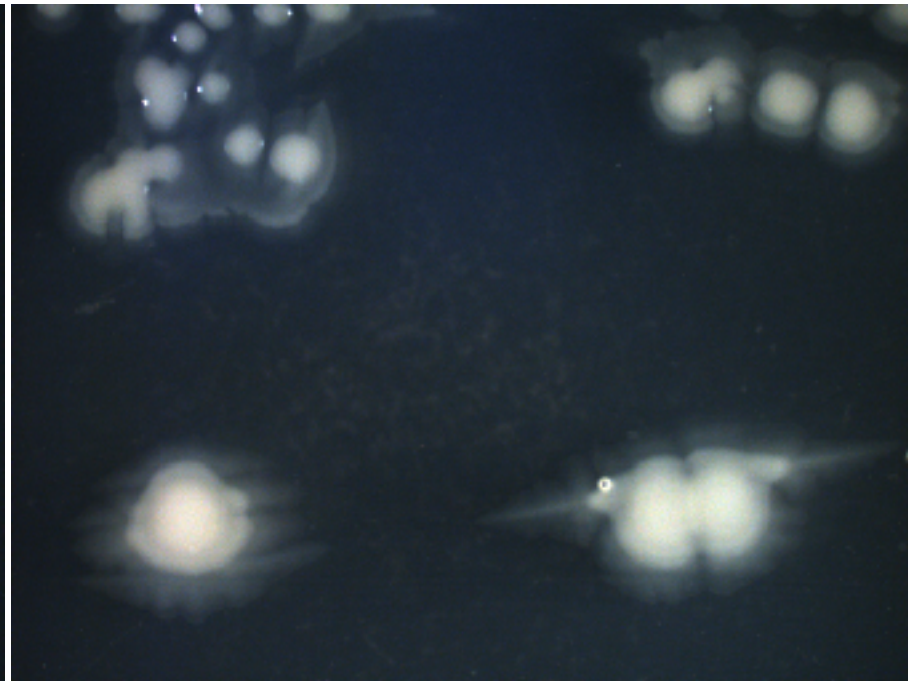

## Bottom View

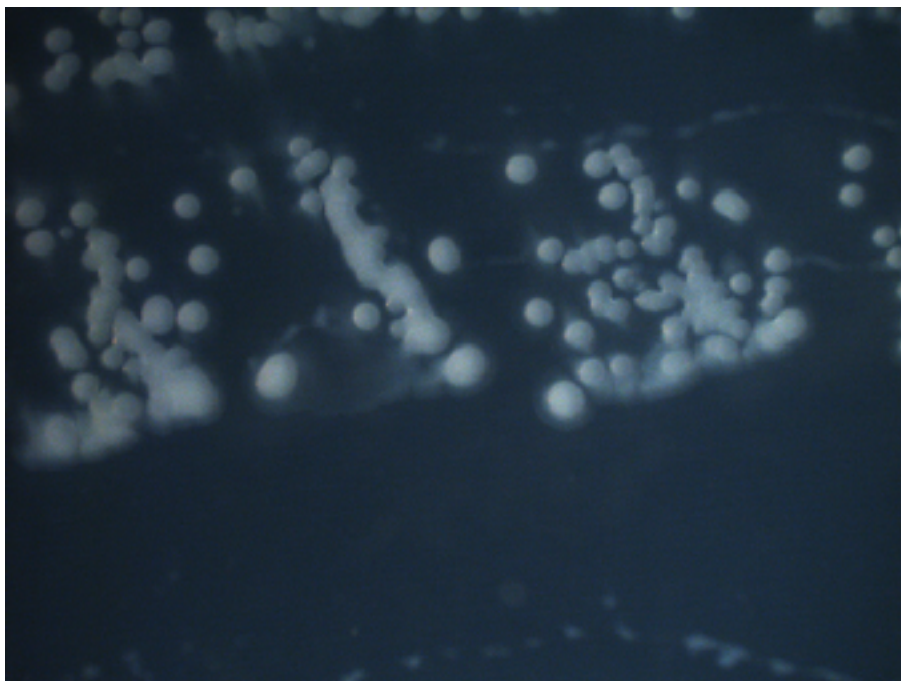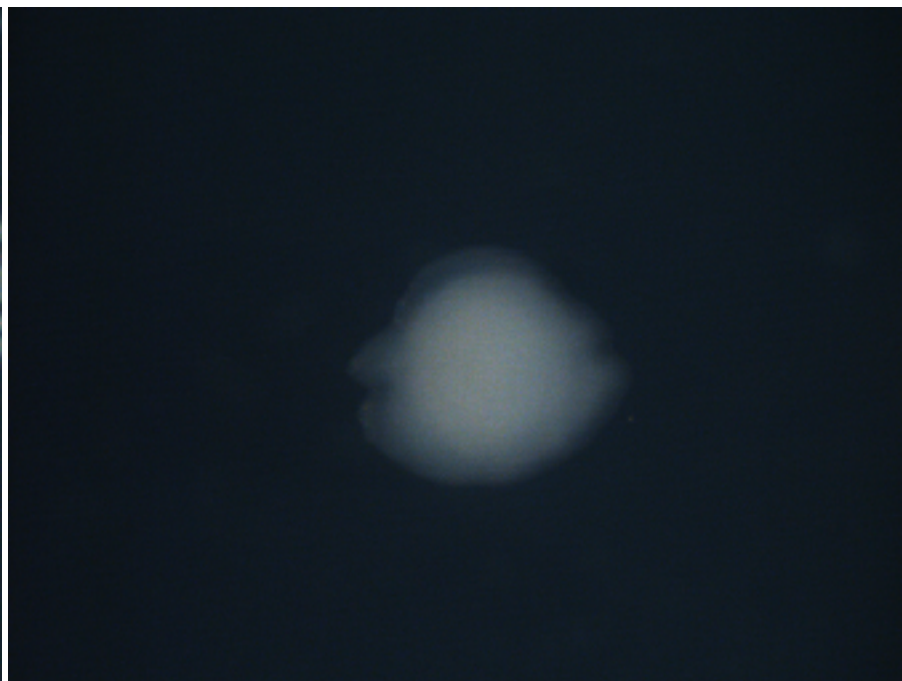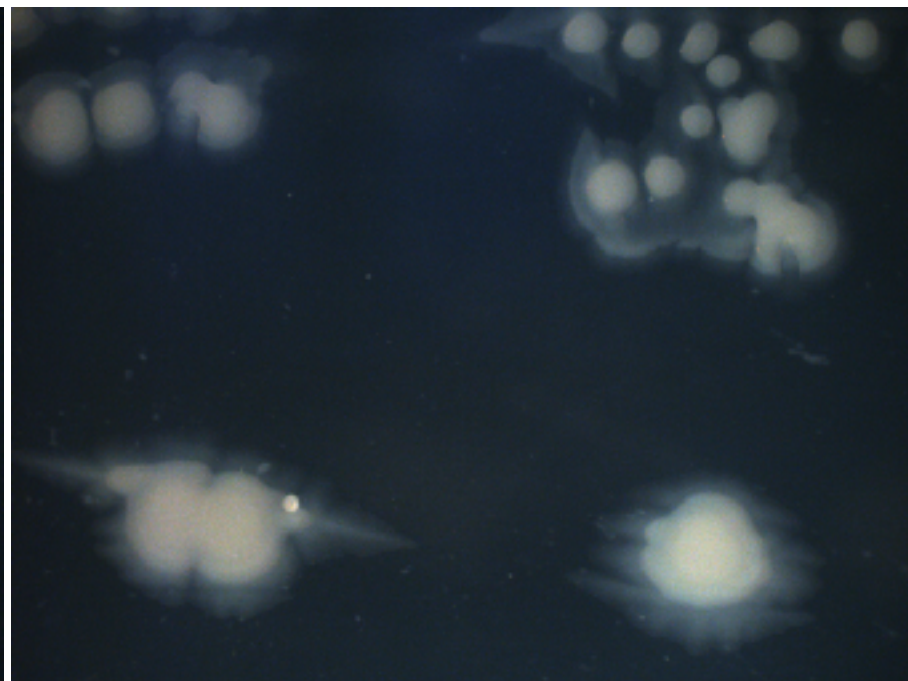



# *Flectobacillus*

Older

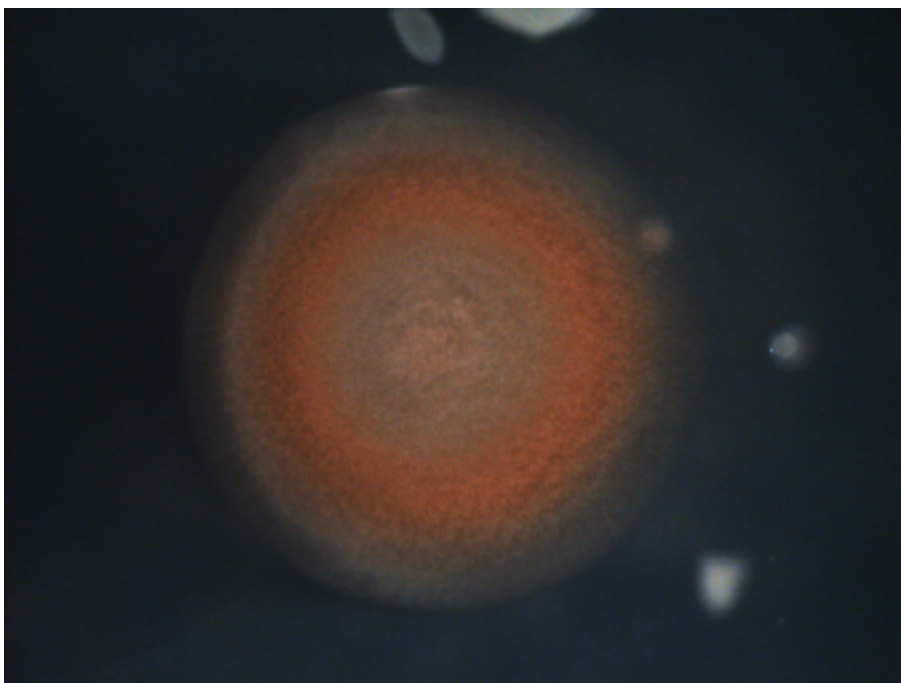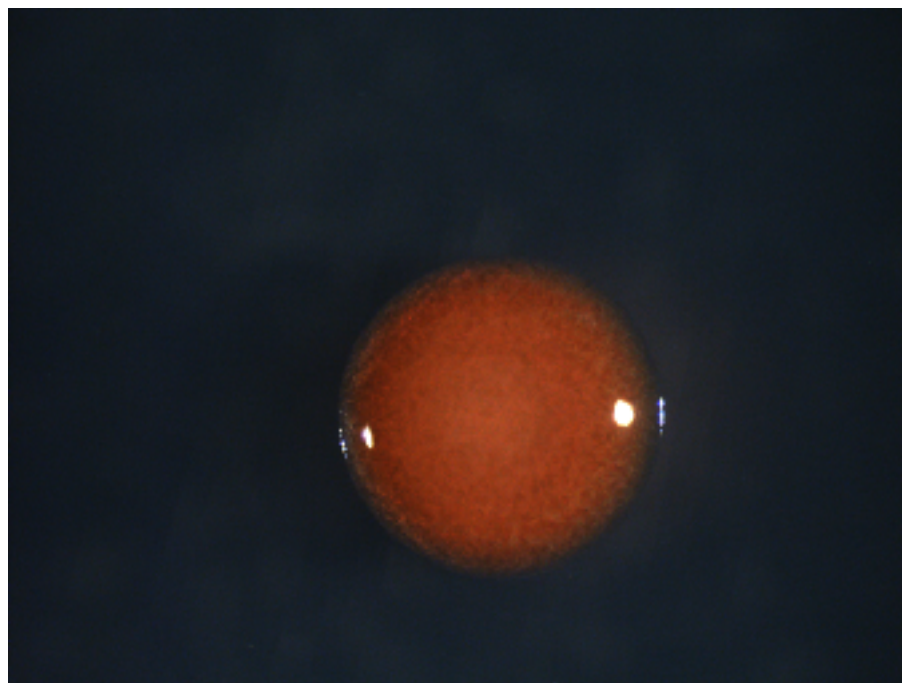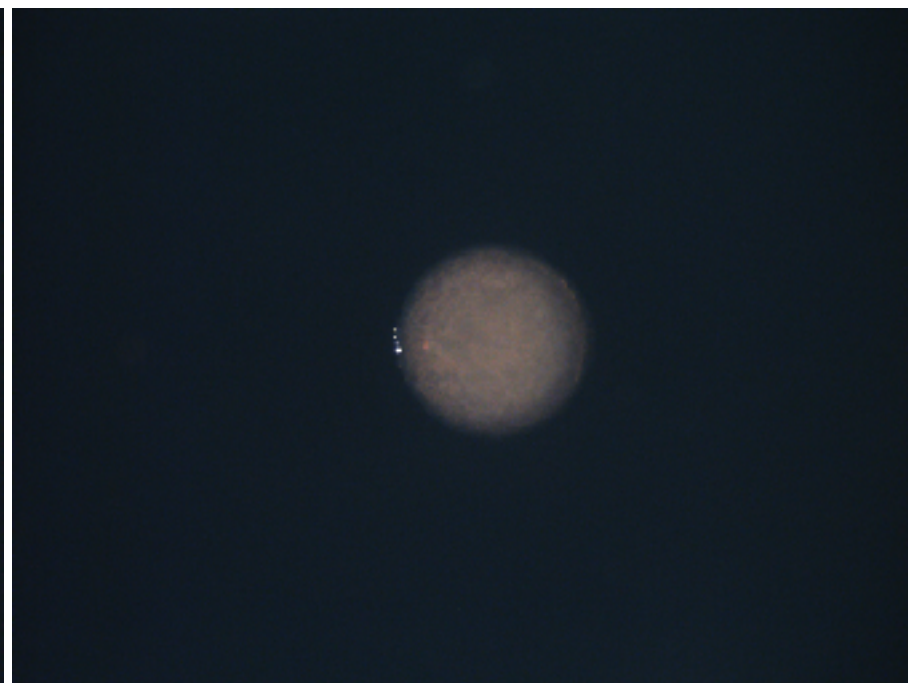

Supplement: Presentation_1.PDF [file Presentation_1.PDF]
