# Supplementary material for: Diet–Microbiota Interactions Alter Mosquito Development
Source: Frontiers journal article supplement (doi:10.3389/fmicb.2021.650743), 2021-06-08
Supplement: Data_Sheet_1.PDF [file Data_Sheet_1.PDF]

## **Supplementary Figures and Tables.**

### **Diet-microbiota interactions alter mosquito development**

Vincent G. Martinson<sup>1, 2\*</sup> and Michael R. Strand<sup>1\*</sup>

<sup>1</sup> Department of Entomology, University of Georgia, Athens, GA 30602, USA

<sup>2</sup> Department of Biology, University of New Mexico, Albuquerque, NM 87131, USA

Address correspondence to either:

Vincent G. Martinson, [vmartinson@unm.edu](mailto:vmartinson@unm.edu)

Michael R. Strand, [mrstrand@uga.edu](mailto:mrstrand@uga.edu)

#### **This PDF file includes:**

Figures S1 to S9

Tables S1 to S4

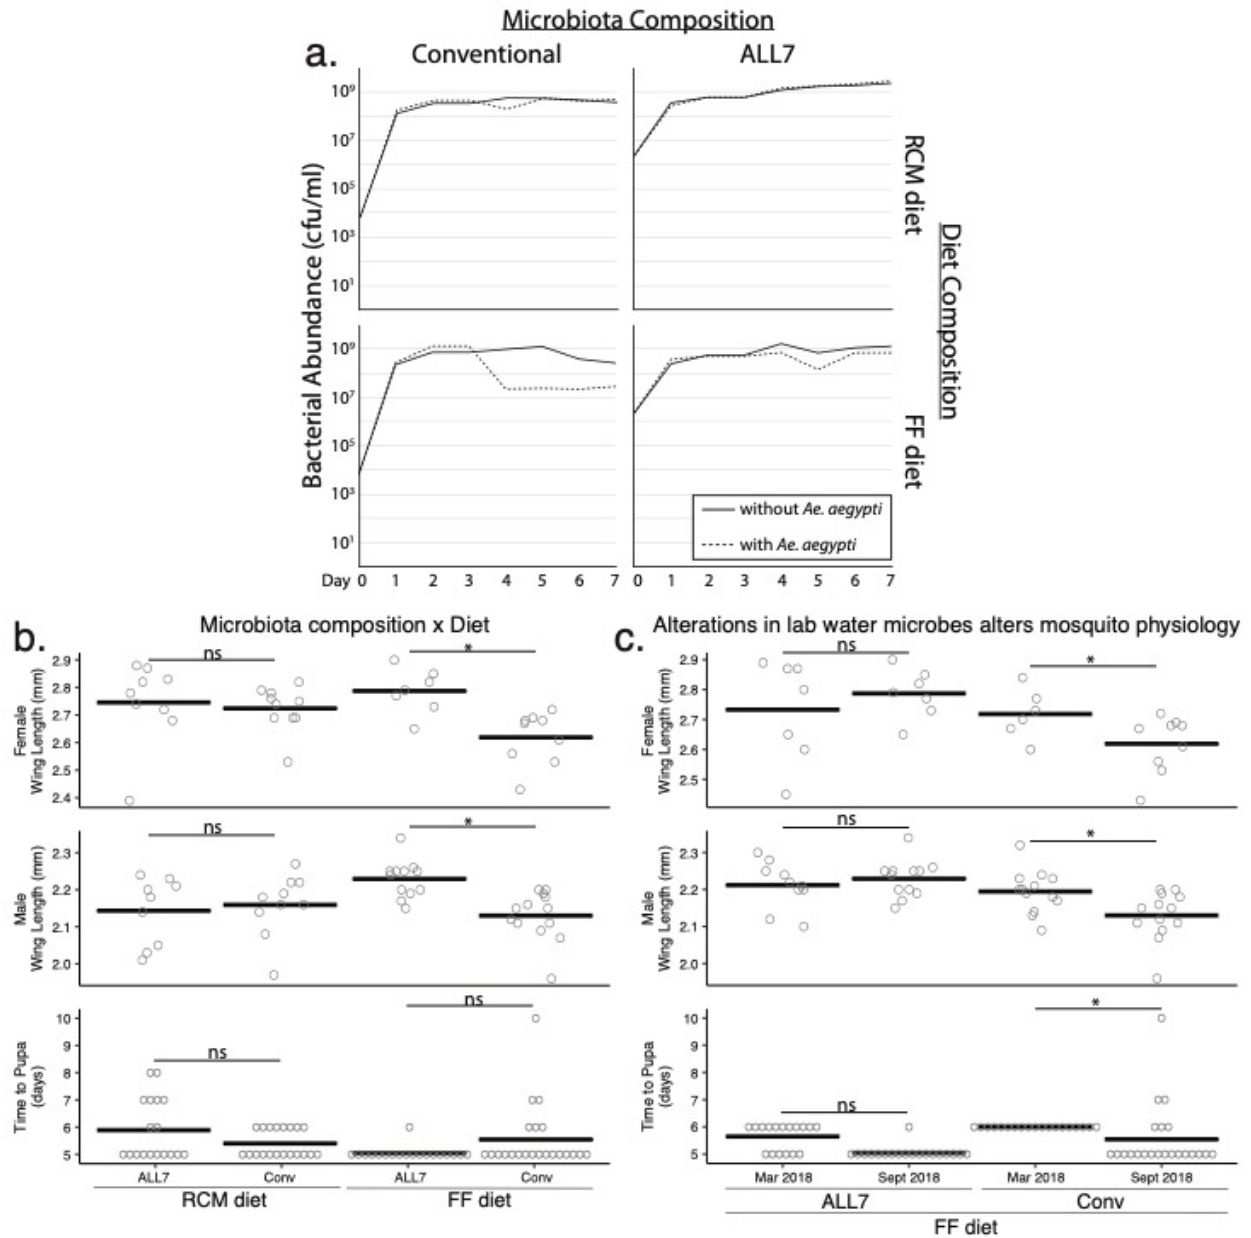

**Figure S1.** Daily abundance of total colony forming units (cfu) in rearing water (a) and the corresponding *A. aegypti* performance metrics (b). *A. aegypti* reared with the conventional or ALL7 microbiota do not differ in metrics on RCM diet but they are significantly different on the FF diet (b). However, measurements taken six months apart (c) show that *A. aegypti* had fewer differences in developmental performance when reared with the ALL7 microbiota than with the contemporary laboratory rearing water microbial community (Conv) where larvae differed significantly in all three developmental metrics.

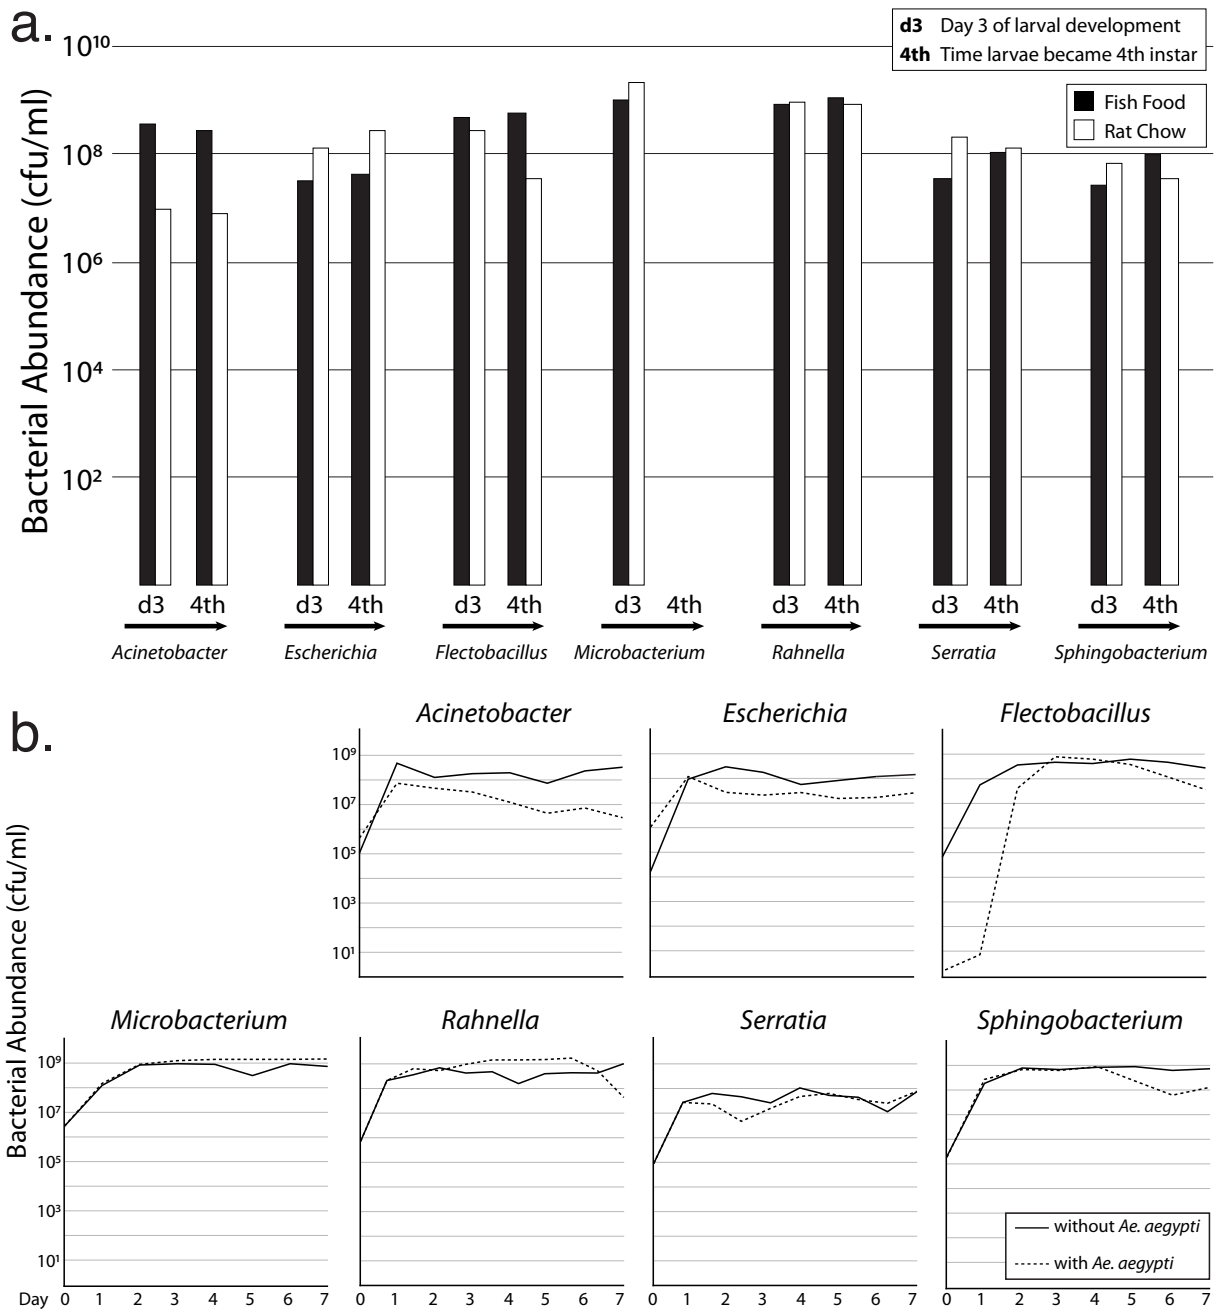

**Figure S2.** Measurements of bacterial cells present in the rearing water during mosquito development. a) The cfu counts for mono-inoculated bacteria in RCM or FF diet treatments at different time points during mosquito development. b) Daily counts of cfu for individual bacterial species that were grown alone or used to rear *A. aegypti* larvae through development on the FF diet.

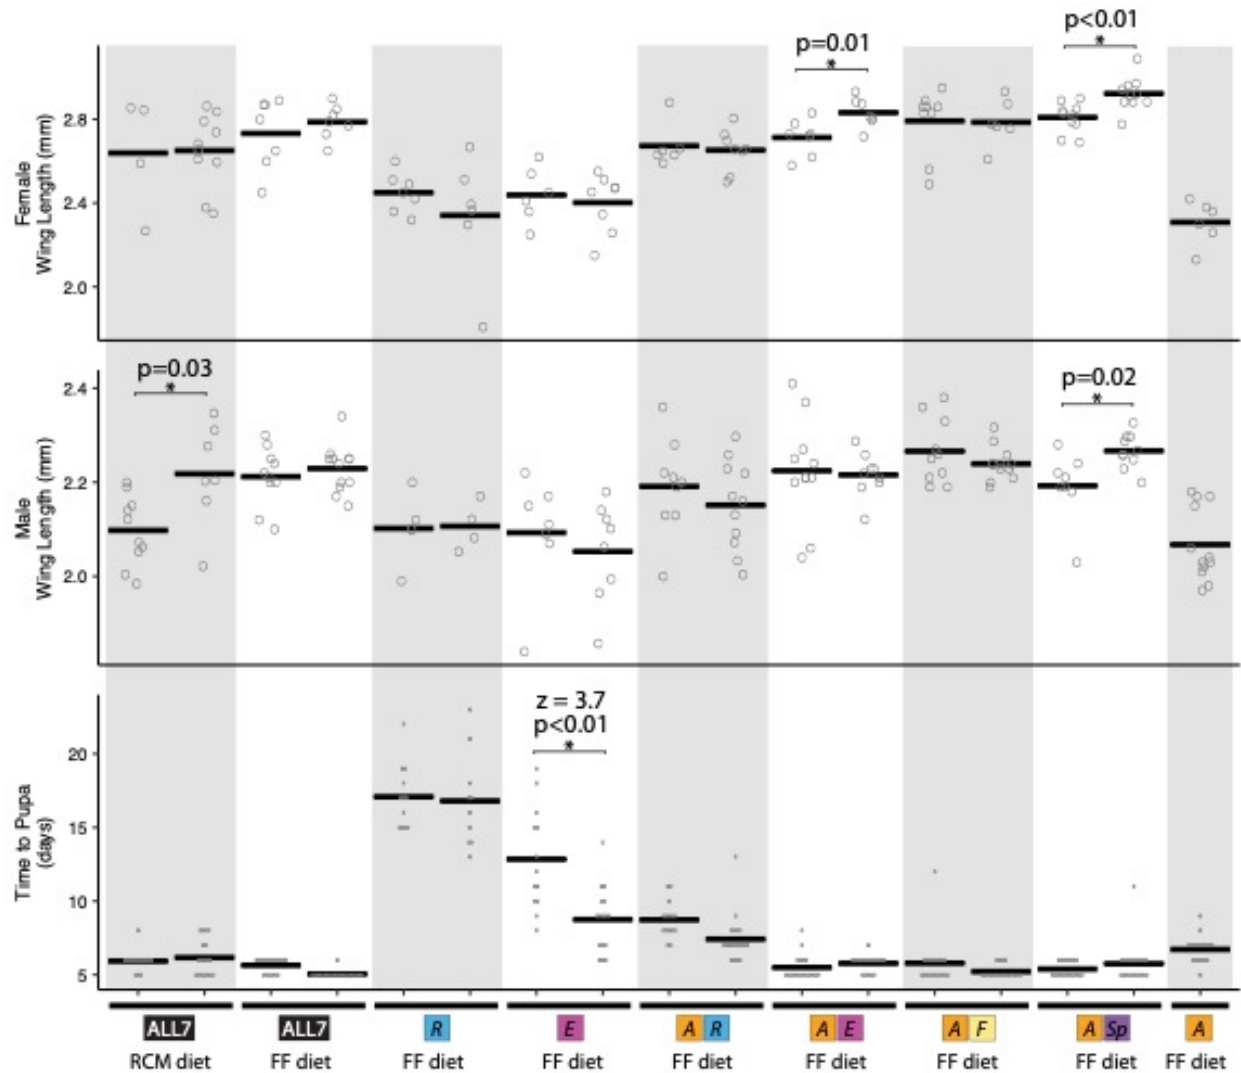

**Figure S3.** Within-treatment replication across different experimental variables including 1) diet, 2) one-member microbiotas, 3) two-member microbiotas. While some measurements were significantly different between replications, the majority were similar in their overall pattern. Specifically, one-member microbiotas produced smaller individuals, and two-member microbiotas produced larger individuals. *Acinetobacter*, FF diet treatment was included for comparison. Bars indicate mean abundance for the treatment. Asterisks indicate a significant difference [wing length, t-test; pupation time, Wilcoxon test].

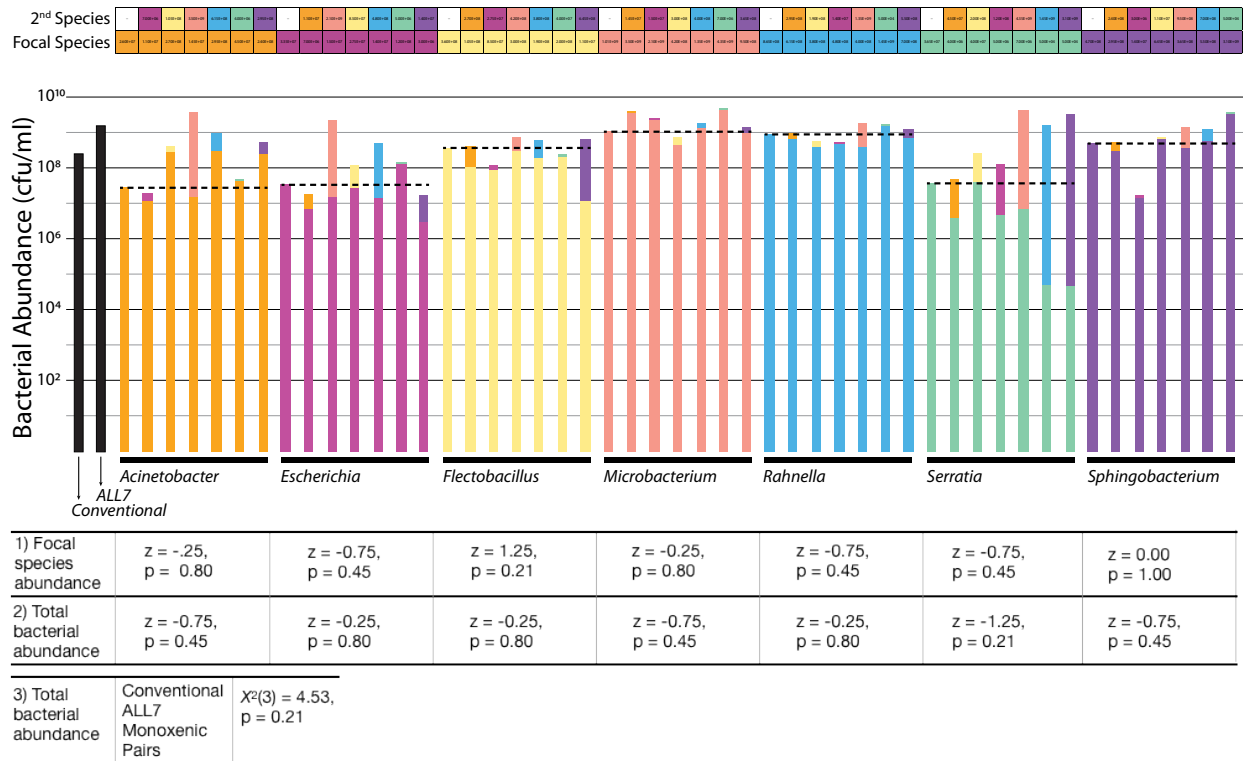

**Figure S4.** The cfu counts of individual bacterial species in the water column containing developing mosquito larvae, three days post inoculation. Each focal species has cfu counts for monoxenic rearing (first bar) and for all six pairwise combinations with a second bacterium. Focal species color is designated by the monoxenic bar where each dashed line originates. Counts of each focal species in monoxenic conditions were compared to counts in pairwise bacterial sets of 1) the focal species, and 2) the total bacterial abundance (sum of paired species abundances). 3) Total bacterial abundance was compared among conventional, ALL7, monoxenic, and paired communities. Comparisons were made with Wilcoxon and Kruskal-Wallis tests.

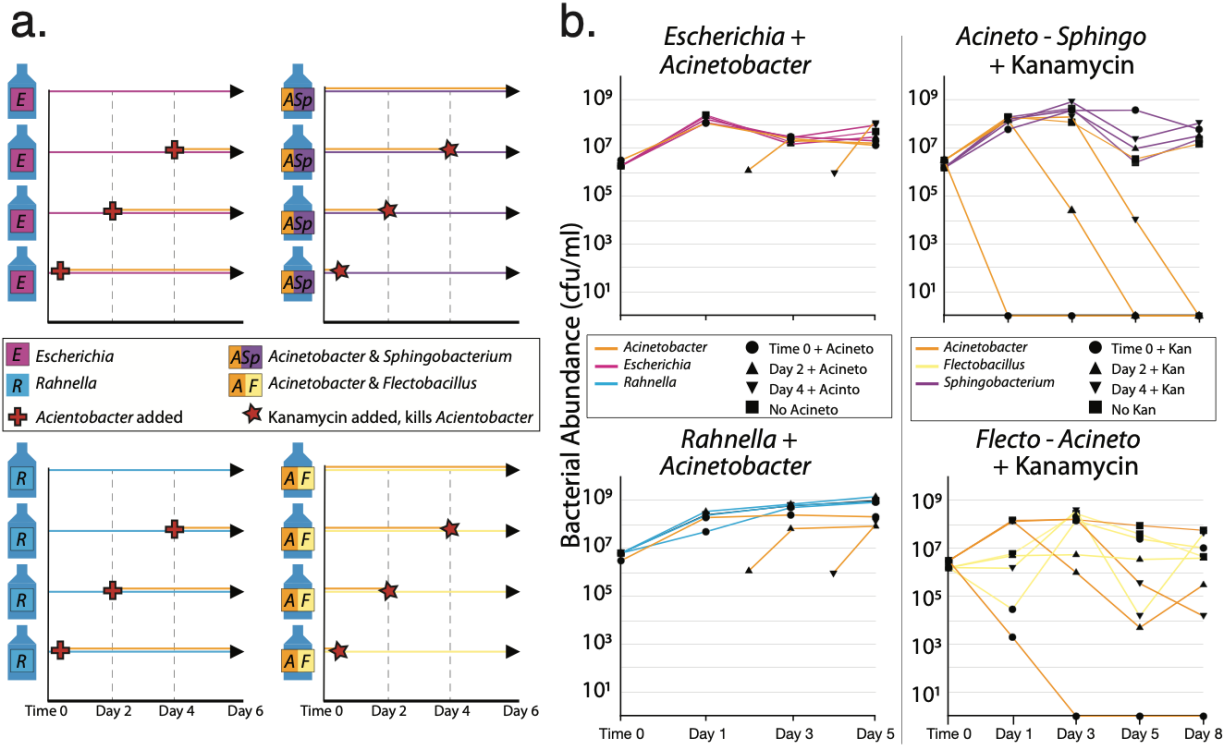

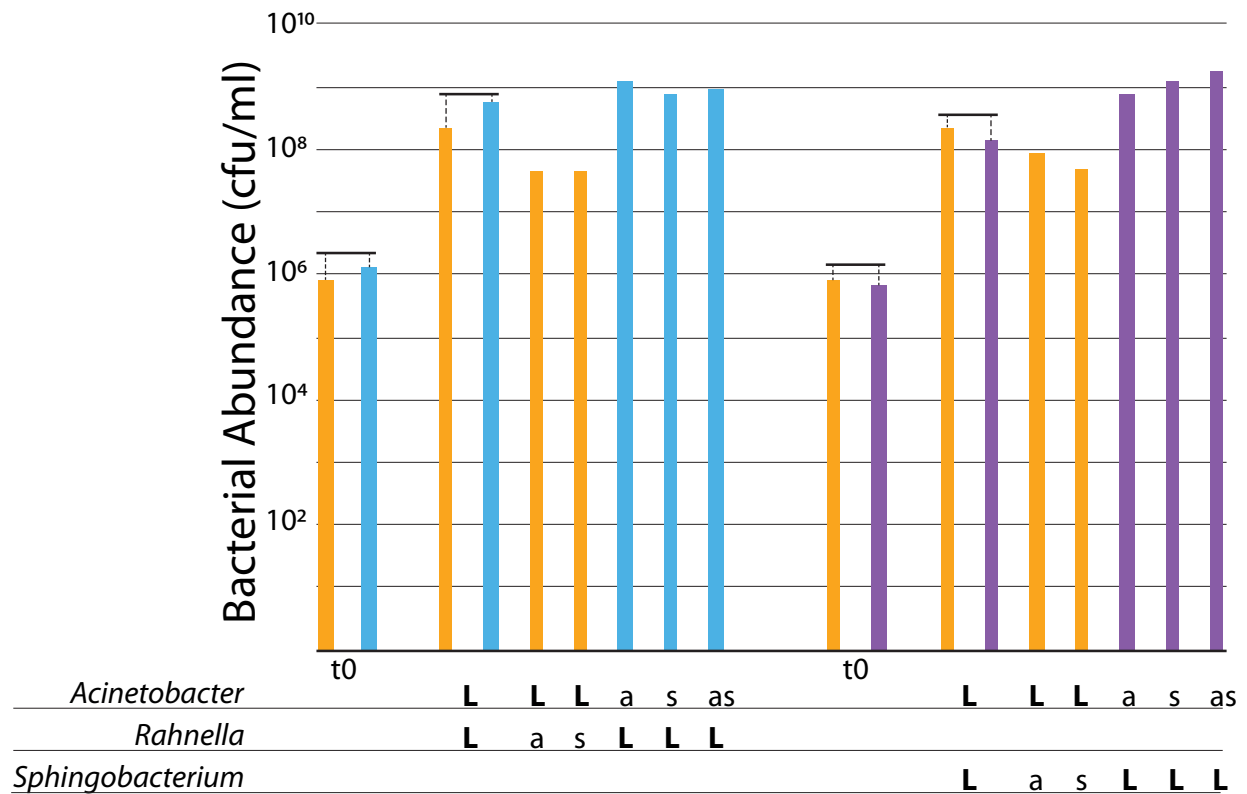

**Figure S6.** The cfu counts for bacterial species paired in combinations of live and dead cells. All measurements were taken on day three of rearing except those of the initial input at t0. t0, Time 0 (initial input); L, Live bacteria; a, dead cells (autoclaved); s, dead cells (sonicated and  $0.2\mu\text{m}$  filtered). Colors for each bacterium correspond to Figure S3.

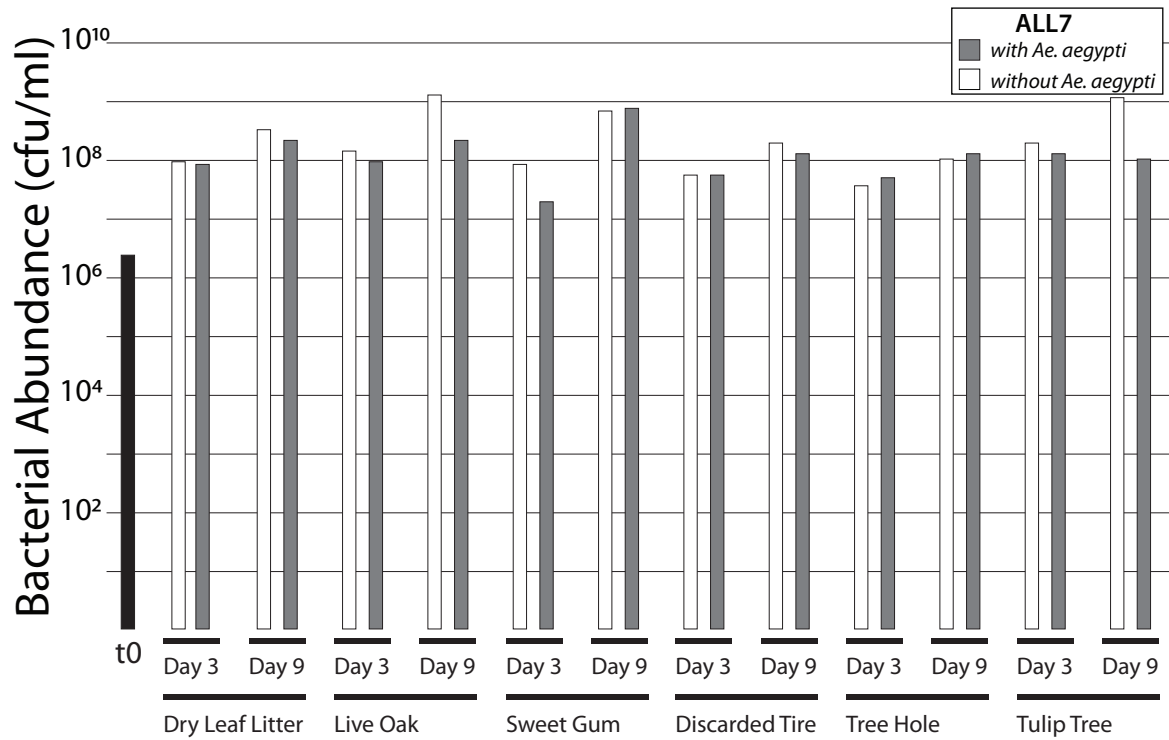

**Figure S7.** The cfu counts for the ALL7 microbiota grown in different natural diets with and without *A. aegypti* larvae. t0, Time 0 (initial input); Day 3, three days post hatching; Day 9, nine days post hatching. Measurements are for total bacterial cells present in the rearing water.



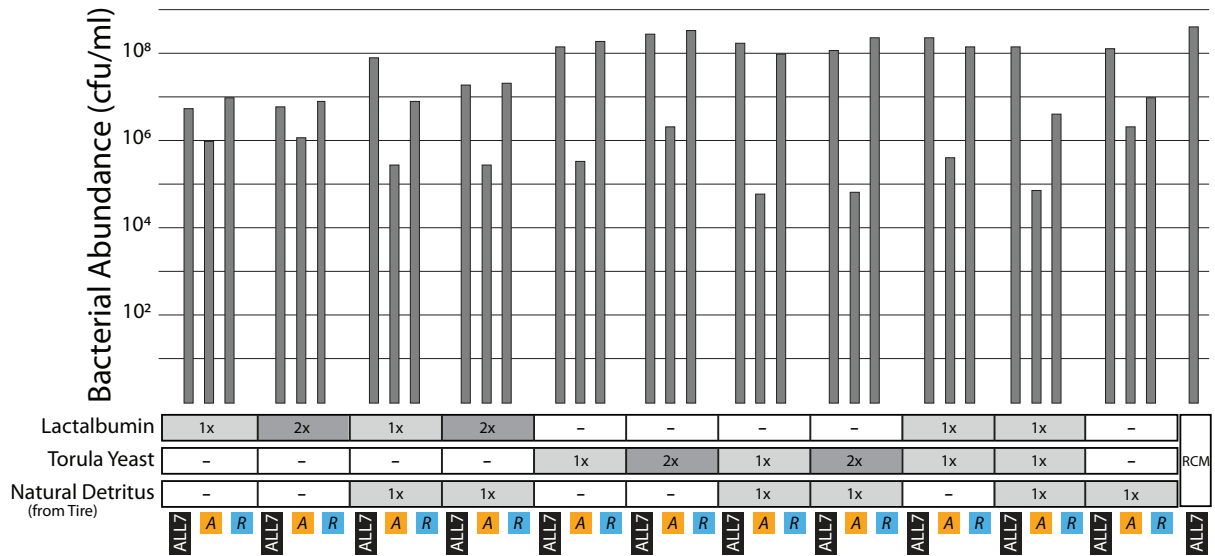

**Figure S8.** Performance metrics of *A. aegypti* reared on diet combinations of lactalbumin, torula yeast, and natural detritus. For each diet composition, mosquitoes were reared with three microbiotas; ALL7, *Acinetobacter* (A), and *Rahnella* (R). Measurements of bacterial abundance (cfu/ml) in rearing water on the third day post inoculation. 1x, diet provisioned at 1/3 quantity of RCM diet; 2x, diet provisioned at 2/3 quantity of RCM diet; -, omitted from diet.

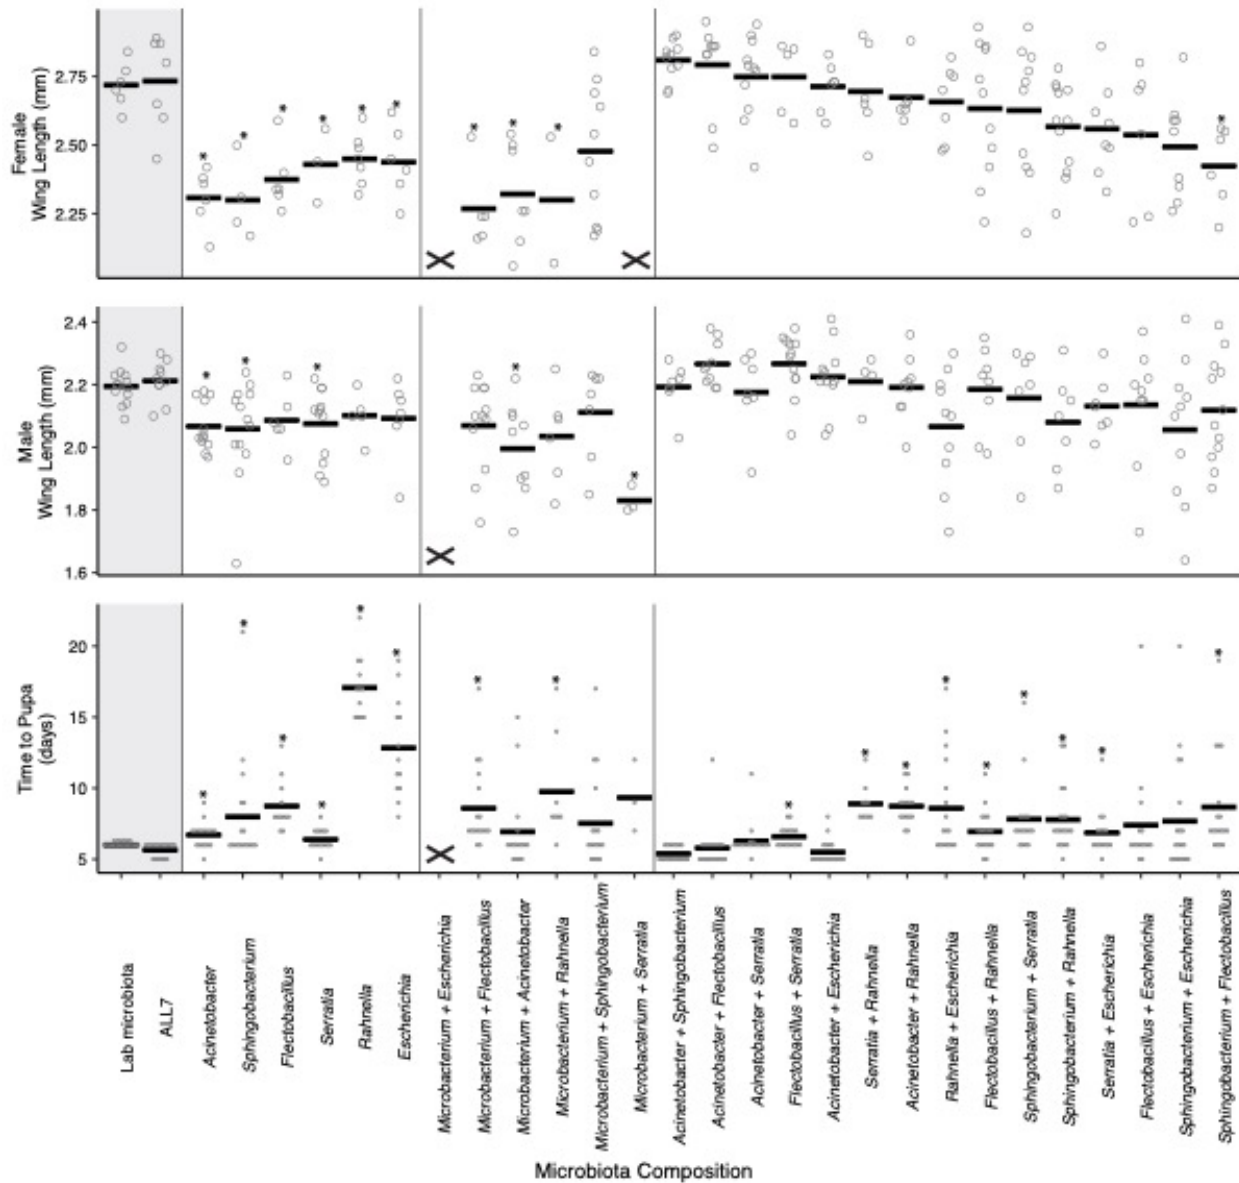

**Figure S9.** Performance metrics of *A. aegypti* reared with FF diet and different microbiotas: laboratory, ALL7, individual bacteria, and bacterial pairs. This figure allows comparisons between mosquitoes reared monoxenically and those reared with paired microbial communities. The “X” marks at the bottom of data columns for “Time to Pupa” and “Wing Length” indicate that larvae did not develop into pupae or adults, respectively. Bars indicate mean abundance for the treatment. Asterisks indicate a significant difference for treatment relative to the community microbiota control = ALL7 [wing length, Dunnett's ( $P < 0.05$ ); pupation time, Steel's ( $P < 0.05$ )].

Table S1.

Table S1. Bacterial strains used in this manuscript that composed the ALL7 community.

| Genus                   | Species     | Strain              | GenBank<br>Accession<br>(16S rRNA /<br>Genome) | Phylum         | Class               | Order              | Family              | Collection Source     | Ampicillin<br>(100ug/ml) | Tetracycline<br>(10ug/ml) | Kanamycin<br>(50ug/ml) | Chloramphenicol<br>(25ug/ml) | Spectinomycin<br>(50ug/ml) |
|-------------------------|-------------|---------------------|------------------------------------------------|----------------|---------------------|--------------------|---------------------|-----------------------|--------------------------|---------------------------|------------------------|------------------------------|----------------------------|
| <i>Microbacterium</i>   |             | Lab0001             | MN544615                                       | Actinobacteria | Actinobacteria      | Actinomycetales    | Microbacteriaceae   | Laboratory Mosquitoes | no                       | no                        | resistant              | no                           | resistant                  |
| <i>Sphingobacterium</i> |             | Lab0004             | MN544616                                       | Bacteroidetes  | Sphingobacteria     | Sphingobacteriales | Sphingobacteriaceae | Laboratory Mosquitoes | no                       | no                        | resistant              | no                           | resistant                  |
| <i>Flectobacillus</i>   |             | Rain0001            | MN544619                                       | Bacteroidetes  | Cytophagia          | Cytophagales       | Cytophagaceae       | Wild 1                | no                       | no                        | resistant              | no                           | resistant                  |
| <i>Rahnella</i>         |             | Rain0009            | MN544617                                       | Proteobacteria | Gammaproteobacteria | Enterobacteriales  | Enterobacteriaceae  | Wild 1                | no                       | no                        | no                     | no                           | no                         |
| <i>Serratia</i>         |             | Rain0010            | MN544614                                       | Proteobacteria | Gammaproteobacteria | Enterobacteriales  | Enterobacteriaceae  | Wild 1                | no                       | no                        | no                     | no                           | no                         |
| <i>Acinetobacter</i>    |             | River0008           | MN544618                                       | Proteobacteria | Gammaproteobacteria | Pseudomonadales    | Moraxellaceae       | Wild 2                | no                       | no                        | no                     | no                           | no                         |
| <i>Escherichia</i>      | <i>coli</i> | K-12 substr. MG1655 | U00096                                         | Proteobacteria | Gammaproteobacteria | Enterobacteriales  | Enterobacteriaceae  | Lab Strain            | no                       | no                        | no                     | no                           | no                         |

| Genus                   | Species     | Strain              | Colony Identification                           |                                                |                                     |
|-------------------------|-------------|---------------------|-------------------------------------------------|------------------------------------------------|-------------------------------------|
|                         |             |                     |                                                 |                                                |                                     |
|                         |             |                     | 24hr growth                                     | 48hr growth                                    | >48hr growth                        |
| <i>Microbacterium</i>   |             | Lab0001             | pinpoint                                        | small, round margin, yellow                    | medium, round margin, bright yellow |
| <i>Sphingobacterium</i> |             | Lab0004             | small, round margin, yellow                     | large, round margin, pale yellow               |                                     |
| <i>Flectobacillus</i>   |             | Rain0001            | small, round margin, mottled pale pink          | medium, round margin, mottled bright pink      |                                     |
| <i>Rahnella</i>         |             | Rain0009            | small, round margin, coarsely mottled white     | medium, round margin, coarsely mottled white   |                                     |
| <i>Serratia</i>         |             | Rain0010            | pinpoint                                        | small, undulate margin, finely mottled white   |                                     |
| <i>Acinetobacter</i>    |             | River0008           | medium, transparent lobate margin, cream center | large, transparent lobate margin, cream center |                                     |
| <i>Escherichia</i>      | <i>coli</i> | K-12 substr. MG1655 | medium, undulate margin, white                  | large, undulate margin, white                  |                                     |

Table S2.

Table S2. Macronutrient composition of RCM and FF diets.

|                               |         | RCM diet components                                           |             |              | Laboratory diets |                                        |
|-------------------------------|---------|---------------------------------------------------------------|-------------|--------------|------------------|----------------------------------------|
|                               |         | LabDiet 5012 (Rat Chow)                                       | Lactalbumin | Torula yeast | RCM diet*        | FF diet (TetraColor Trop. Granules)    |
| Macronutrient (% content w/w) | Protein | 22                                                            | 100         | 50           | 57.3             | 47.5                                   |
|                               | Fat     | 4                                                             | 0           | 2            | 2                | 6.5                                    |
|                               | Fiber   | 5                                                             | 0           | 0            | 1.7              | 2                                      |
| Ingredients                   |         | ground corn                                                   | lactalbumin | torula yeast |                  | fish meal                              |
|                               |         | dehulled soybean meal                                         |             |              |                  | dehulled soybean meal                  |
|                               |         | fish meal                                                     |             |              |                  | wheat germ meal                        |
|                               |         | wheat middlings                                               |             |              |                  | wheat flour                            |
|                               |         | cane molasses                                                 |             |              |                  | corn gluten                            |
|                               |         | dehydrated alfalfa meal                                       |             |              |                  | feeding oat meal                       |
|                               |         | soybean oil                                                   |             |              |                  | potato protein                         |
|                               |         | ground oats                                                   |             |              |                  | shrimp meal                            |
|                               |         | dried beet pulp                                               |             |              |                  | dried yeast                            |
|                               |         | wheat germ                                                    |             |              |                  | wheat gluten                           |
|                               |         | brewers dried yeast                                           |             |              |                  | monobasic calcium phosphate            |
|                               |         | dicalcium phosphate                                           |             |              |                  | L-lysine monohydrochloride             |
|                               |         | calcium carbonate                                             |             |              |                  | lecithin                               |
|                               |         | salt                                                          |             |              |                  | algae meal                             |
|                               |         | DL-methionine                                                 |             |              |                  | soybean oil                            |
|                               |         | choline chloride                                              |             |              |                  | yeast extract                          |
|                               |         | cholecalciferol                                               |             |              |                  | ascorbic acid (source of vitamin C)    |
|                               |         | menadione dimethylpyrimidinol bisulfite (source of vitamin K) |             |              |                  | cholin choride                         |
|                               |         | pyridoxine hydrochloride                                      |             |              |                  | D-calcium pantothenate                 |
|                               |         | vitamin A acetate                                             |             |              |                  | thiamine mononitrate                   |
|                               |         | biotin                                                        |             |              |                  | pyridoxine hydrochloride               |
|                               |         | thiamine mononitrate                                          |             |              |                  | bisulfite complex                      |
|                               |         | vitamin B12 supplement                                        |             |              |                  | folic acid                             |
|                               |         | dl-alpha tocopheryl acetate (form of vitaminE)                |             |              |                  | biotin                                 |
|                               |         | nicotinic acid                                                |             |              |                  | vitamin B12 supplement                 |
|                               |         | calcium pantothenate                                          |             |              |                  | cholecalciferol (source of vitamin D3) |
|                               |         | riboflavin supplement                                         |             |              |                  | manganese sulfate                      |
|                               |         | manganous oxide                                               |             |              |                  | zinc sulfate                           |
|                               |         | zinc oxide                                                    |             |              |                  | ferrous sulfate                        |
|                               |         | ferrous carbonate                                             |             |              |                  | cobalt acetate                         |
|                               |         | coppersulfate                                                 |             |              |                  | beta-carotene                          |
|                               |         | zinc sulfate                                                  |             |              |                  | annato extract                         |
|                               |         | calcium iodate                                                |             |              |                  | red 3                                  |
|                               |         | cobalt carbonate                                              |             |              |                  | ethoxyquin                             |
|                               |         |                                                               |             |              |                  | citric acid                            |

\* RCM is equal parts LabDiet 5012, Lactalbumin, and Torula Yeast

**Table S3.**

**Table S3.** Sample source and tissues/materials of field-collected detritus diets used in this study with pupation and eclosion rates for *A. aegypti* reared with the ALL7 or endemic microbiotas.

| Common Name     | Species name                   | Material Irradiated                      | ALL7 microbiota |        | Endemic microbiota |        |
|-----------------|--------------------------------|------------------------------------------|-----------------|--------|--------------------|--------|
|                 |                                |                                          | Pupation        | Adults | Pupation           | Adults |
| Tulip Tree      | <i>Liriodendron tulipifera</i> | Fresh leaves                             | 5/20            | 4/20   | –                  | –      |
| Sweet Gum       | <i>Liquidambar styraciflua</i> | Fresh leaves                             | 0/20            | 0/20   | –                  | –      |
| Live Oak        | <i>Quercus virginiana</i>      | Fresh leaves                             | 0/20            | 0/20   | –                  | –      |
| Dry Leaf Litter | Mixed Species                  | Dried leaves                             | 0/20            | 0/20   | –                  | –      |
| Tree Hole       | Inside <i>L. styraciflua</i>   | Wet detritus, mixed leaves, sticks, dirt | 0/20            | 0/20   | 2/20               | 2/20   |
| Discarded Tire  | Inside a car tire              | Wet detritus, mixed leaves, sticks, dirt | 0/20            | 0/20   | 1/20               | 1/20   |

**Table S4.****Table S4.** Developmental measurements for adult *A. aegypti* reared with detritus diets.

| Diet           | Microbiota         | Sex          | Wing Length (mm) | Time to pupa (days) |
|----------------|--------------------|--------------|------------------|---------------------|
| Tulip Tree     | All7               | Female       | 1.95             | 19                  |
| Tulip Tree     | All7               | Male         | 2.36             | 21                  |
| Tulip Tree     | All7               | Male         | 2.18             | 25                  |
| Tulip Tree     | All7               | Male         | 2.24             | 21                  |
| Tulip Tree     | All7               | Died as pupa | –                | 16                  |
| TreeHole       | Endemic Microbiota | Male         | 1.64             | 22                  |
| TreeHole       | Endemic Microbiota | Male         | 1.61             | 24                  |
| Discarded Tire | Endemic Microbiota | Male         | 1.73             | 11                  |
